# Supplementary material for: Synthesis and Biological Evaluation of Novel Amino and Amido Substituted Pentacyclic Benzimidazole Derivatives as Antiproliferative Agents
Source: MDPI journal article supplement (doi:10.3390/ijms25042288), 2024-02-14
Supplement: s1 [file s1]

**Synthesis and biological evaluation of novel amino and amido substituted pentacyclic benzimidazole derivatives**

Nataša Perin<sup>1</sup>, Marjana Gulin<sup>1</sup>, Marija Kos<sup>1</sup>, Leentje Persoons<sup>2</sup>, Dirk Daelmans<sup>2</sup>, Ivana Fabijanić<sup>3</sup>, Marijana Radić Stojković<sup>3,\*</sup> and Marijana Hranjec<sup>1,\*</sup>

<sup>1</sup> Department of Organic Chemistry, Faculty of Chemical Engineering and Technology, University of Zagreb, Marulićev trg 20, HR-10000 Zagreb, Croatia;

<sup>2</sup> KU Leuven, Department of Microbiology and Immunology, Laboratory of Virology and Chemotherapy, Rega Institute, Leuven, Belgium; <sup>3</sup> Ruđer Bošković Institute, Division of Organic Chemistry and Biochemistry, Bijenička cesta 54, HR-10000 Zagreb, Croatia;

**Contents**

1. Spectroscopic characterization of pentacyclic benzimidazoles in aqueous solutions.
2. Interactions of pentacyclic benzimidazoles with ds-polynucleotides in neutral medium (pH=7.0)
  - 2.1. Fluorimetric titrations
  - 2.2. Thermal melting experiments
  - 2.3. Circular dichroism (CD) titrations
3. NMR spectra of synthesized compounds (S18-S59)

# 1. Spectroscopic characterization of pentacyclic benzimidazoles in aqueous solutions

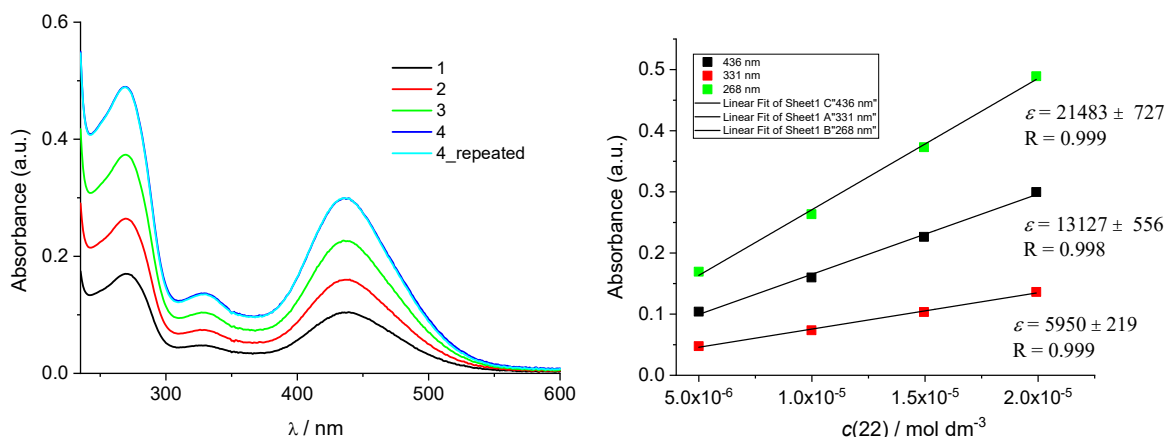

**Figure S1.** UV/Vis spectra changes of **22** at different concentrations (concentration range from  $5.0 \times 10^{-6}$  to  $2.0 \times 10^{-5}$  mol dm<sup>-3</sup>) at pH=7.0, sodium cacodylate buffer,  $I=0.05$  M.

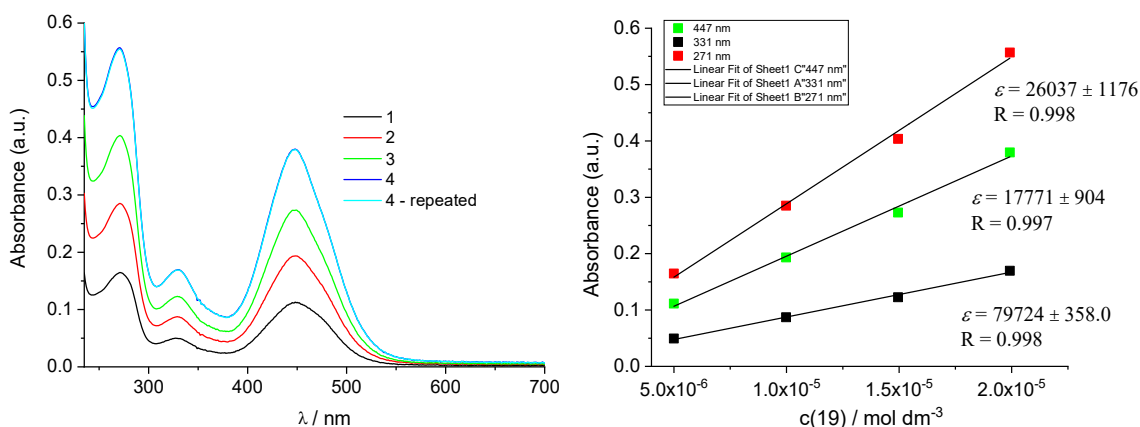

**Figure S2.** UV/Vis spectra changes of **19** at different concentrations (concentration range from  $5.0 \times 10^{-6}$  to  $1.99 \times 10^{-5}$  mol dm<sup>-3</sup>) at pH=7.0, sodium cacodylate buffer,  $I=0.05$  M.

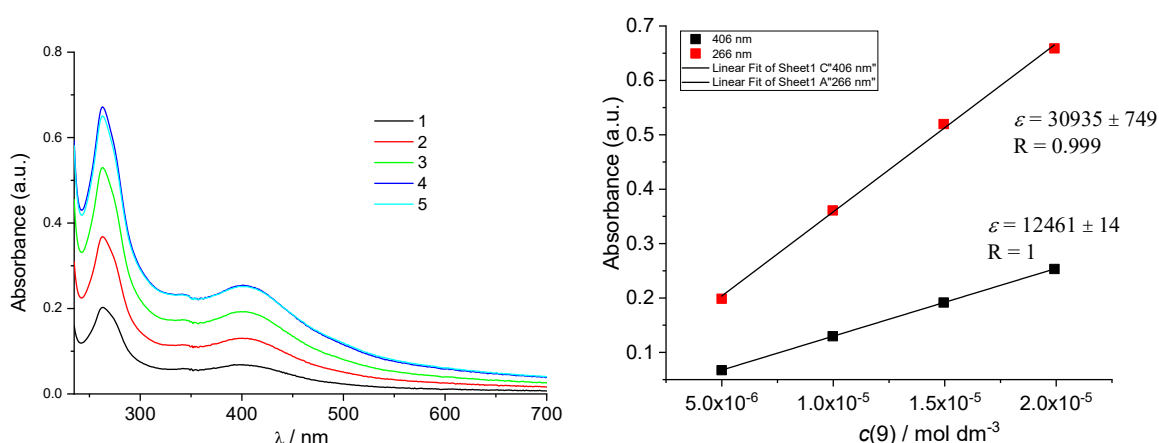

**Figure S3.** UV/Vis spectra changes of **9** at different concentrations (concentration range from  $5.0 \times 10^{-6}$  to  $1.99 \times 10^{-5}$  mol dm<sup>-3</sup>) at pH=7.0, sodium cacodylate buffer,  $I=0.05$  M.

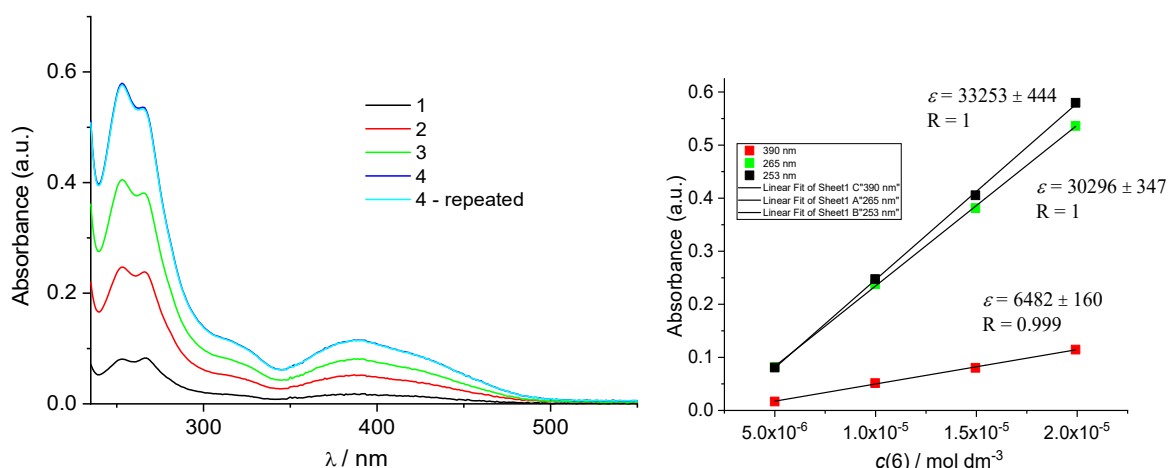

**Figure S4.** UV/Vis spectra changes of **6** at different concentrations (concentration range from  $5.0 \times 10^{-6}$  to  $1.99 \times 10^{-5}$  mol dm $^{-3}$ ) at pH=7.0, sodium cacodylate buffer,  $I=0.05$  M.

**Table S1.** Electronic absorption data of **6**, **9**, **19** and **22**.

|           | pH = 7.0 <sup>a</sup>              |                                                       |
|-----------|------------------------------------|-------------------------------------------------------|
|           | $\lambda_{\text{max}} / \text{nm}$ | $\epsilon \times 10^3 / \text{mmol}^{-1} \text{cm}^2$ |
| <b>6</b>  | 253                                | 33.25                                                 |
|           | 265                                | 30.30                                                 |
|           | 390                                | 6.48                                                  |
| <b>9</b>  | 266                                | 30.93                                                 |
|           | 406                                | 12.46                                                 |
| <b>19</b> | 271                                | 26.04                                                 |
|           | 447                                | 17.77                                                 |
| <b>22</b> | 268                                | 21.48                                                 |
|           | 436                                | 13.13                                                 |

<sup>a</sup> Sodium cacodylate buffer,  $I = 0.05$  mol dm $^{-3}$ , pH = 7.0.

The emission intensities of buffered aqueous solutions (sodium cacodylate buffer,  $I = 0.05$  mol dm $^{-3}$ , pH = 7.0) of studied compounds were proportional to their concentrations up to  $c = 2.0 \times 10^{-6}$  mol dm $^{-3}$  (Figures S5-S8).

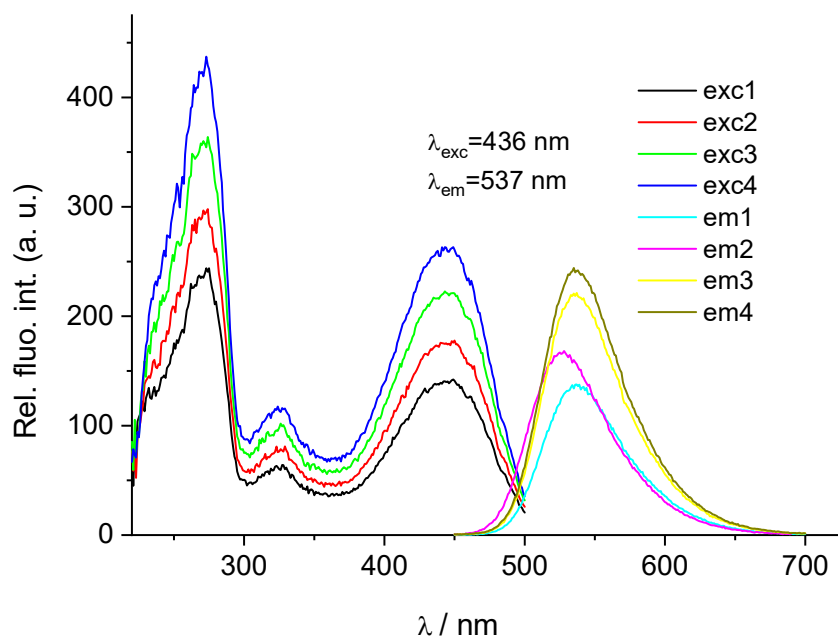

**Figure S5.** Emission and excitation spectra changes of **22** at different concentrations at  $\lambda_{\text{exc}}=436$  nm (concentration range from  $5.0 \times 10^{-7}$  to  $2.0 \times 10^{-6}$  mol dm $^{-3}$ ) at pH=7.0, Na cacodylate buffer,  $I=0.05$  mol dm $^{-3}$ .

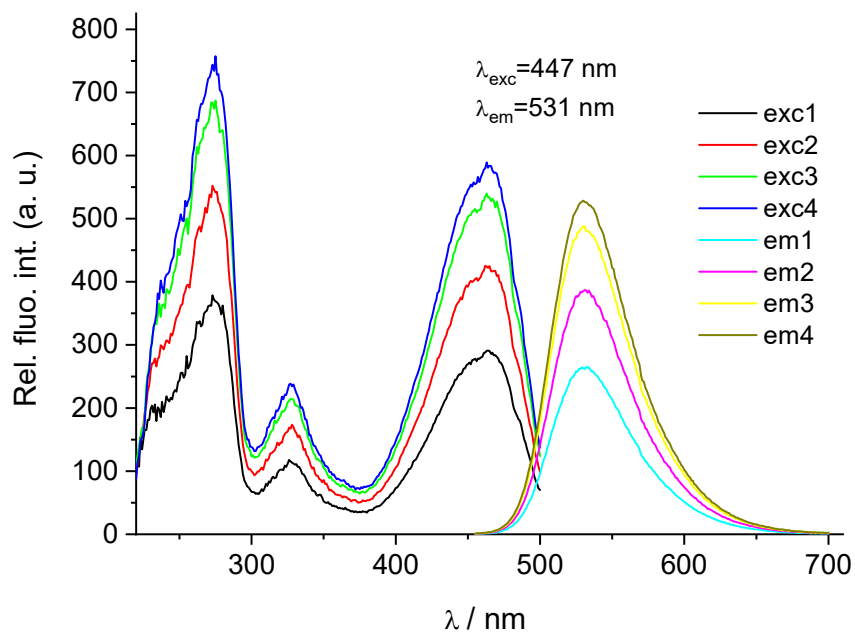

**Figure S6.** Emission and excitation spectra changes of **19** at different concentrations at  $\lambda_{\text{exc}}=447$  nm (concentration range from  $5.0 \times 10^{-7}$  to  $2.0 \times 10^{-6}$  mol dm $^{-3}$ ) at pH=7.0, Na cacodylate buffer,  $I=0.05$  mol dm $^{-3}$ .

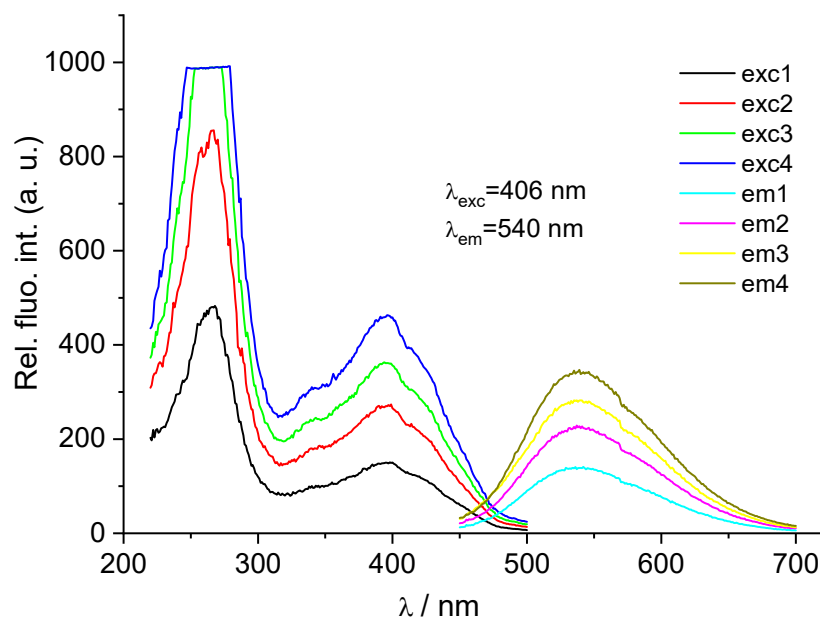

**Figure S7.** Emission and excitation spectra changes of **9** at different concentrations at  $\lambda_{\text{exc}}=406$  nm (concentration range from  $5.0 \times 10^{-7}$  to  $2.0 \times 10^{-6}$  mol dm $^{-3}$ ) at pH=7.0, Na cacodylate buffer,  $I=0.05$  mol dm $^{-3}$ .

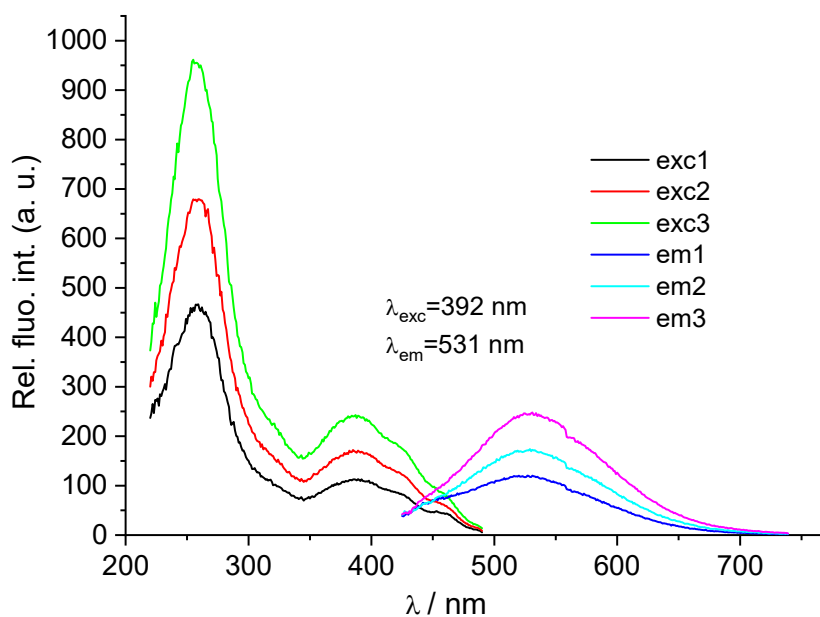

**Figure S8.** Emission and excitation spectra changes of **6** at different concentrations at  $\lambda_{\text{exc}}=392$  nm (concentration range from  $5.0 \times 10^{-7}$  to  $2.0 \times 10^{-6}$  mol dm $^{-3}$ ) at pH=7.0, Na cacodylate buffer,  $I=0.05$  mol dm $^{-3}$ .

## 2. Interactions of pentacyclic benzimidazoles with ds-polynucleotides in neutral medium (pH=7.0)

### 2.1. Fluorimetric titrations

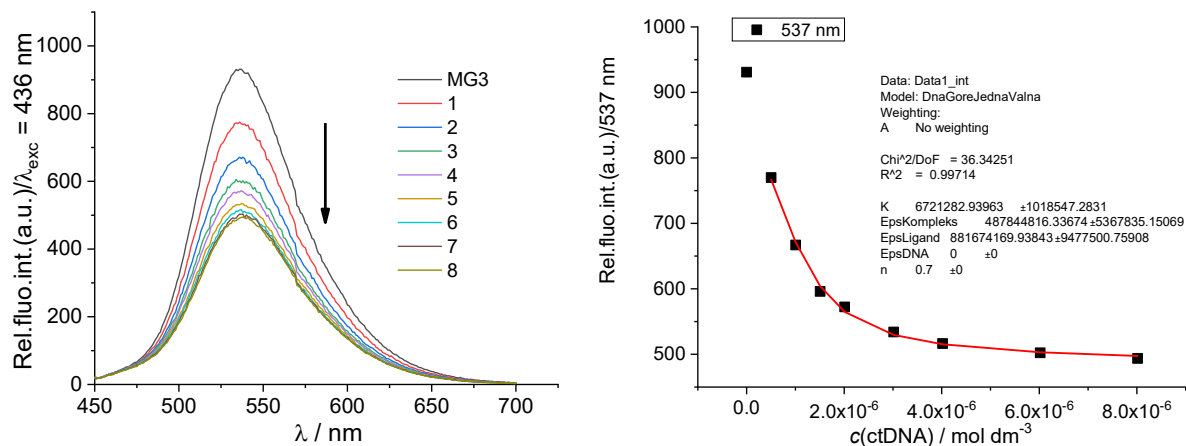

**Figure S9.** a) Changes in fluorescence spectrum of **22** ( $c = 1.0 \times 10^{-6} \text{ mol dm}^{-3}$ ,  $\lambda_{\text{exc}} = 436 \text{ nm}$ ) upon titration with ctDNA ( $c = 5.0 \times 10^{-7} - 8.0 \times 10^{-6} \text{ mol dm}^{-3}$ ); b) Dependence of **22** absorbance at  $\lambda_{\text{max}} = 537 \text{ nm}$  on  $c(\text{ctDNA})$ , at pH=7.0, sodium cacodylate buffer,  $I = 0.05 \text{ mol dm}^{-3}$ .

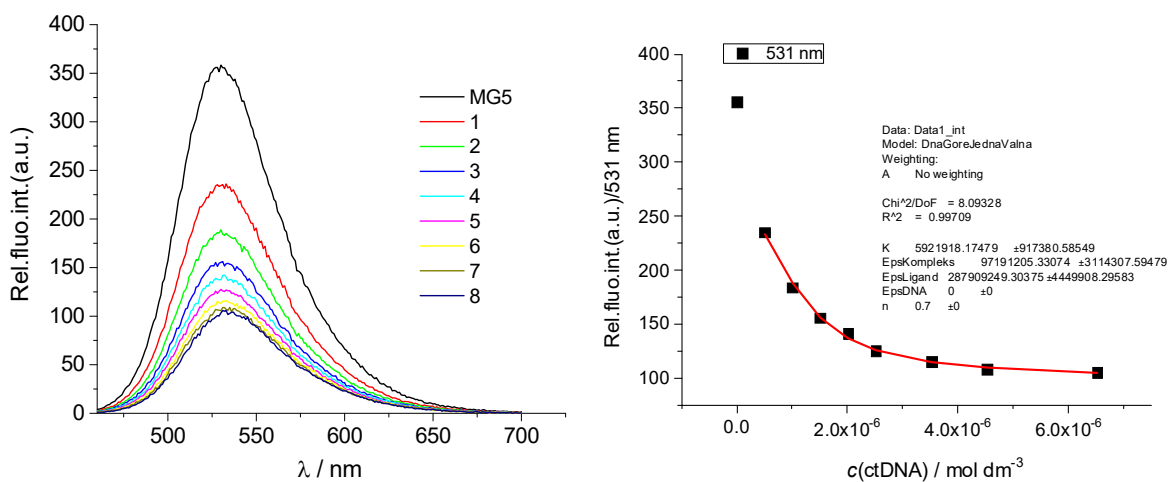

**Figure S10.** a) Changes in fluorescence spectrum of **19** ( $c = 1.0 \times 10^{-6} \text{ mol dm}^{-3}$ ,  $\lambda_{\text{exc}} = 447 \text{ nm}$ ) upon titration with ctDNA ( $c = 5.0 \times 10^{-7} - 6.5 \times 10^{-6} \text{ mol dm}^{-3}$ ); b) Dependence of **19** absorbance at  $\lambda_{\text{max}} = 531 \text{ nm}$  on  $c(\text{ctDNA})$ , at pH=7.0, sodium cacodylate buffer,  $I = 0.05 \text{ mol dm}^{-3}$ .

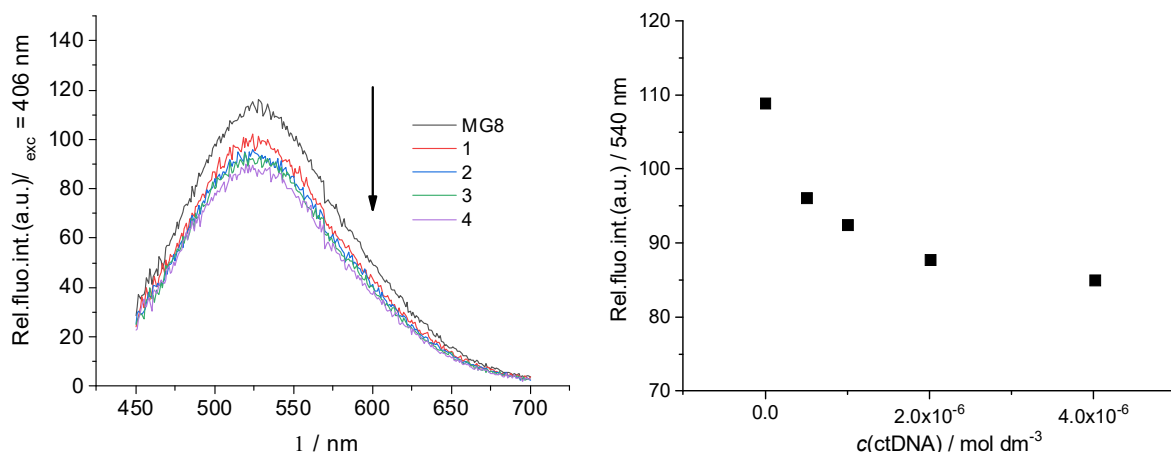

**Figure S11.** a) Changes in fluorescence spectrum of **9** ( $c = 1.0 \times 10^{-6} \text{ mol dm}^{-3}$ ,  $\lambda_{exc} = 406 \text{ nm}$ ) upon titration with ctDNA ( $c = 5.0 \times 10^{-7} - 4.0 \times 10^{-6} \text{ mol dm}^{-3}$ ); b) Dependence of **9** absorbance at  $\lambda_{max} = 540 \text{ nm}$  on  $c(\text{ctDNA})$ , at pH=7.0, sodium cacodylate buffer,  $I = 0.05 \text{ mol dm}^{-3}$ .

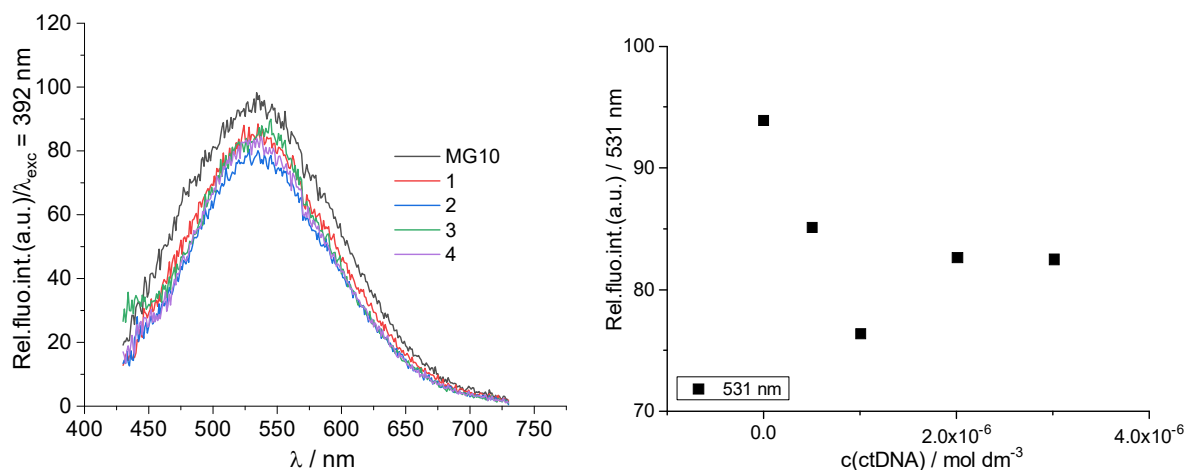

**Figure S12.** a) Changes in fluorescence spectrum of **6** ( $c = 1.0 \times 10^{-6} \text{ mol dm}^{-3}$ ,  $\lambda_{exc} = 392 \text{ nm}$ ) upon titration with ctDNA ( $c = 5.0 \times 10^{-7} - 4.0 \times 10^{-6} \text{ mol dm}^{-3}$ ); b) Dependence of **6** absorbance at  $\lambda_{max} = 531 \text{ nm}$  on  $c(\text{ctDNA})$ , at pH=7.0, sodium cacodylate buffer,  $I = 0.05 \text{ mol dm}^{-3}$ .

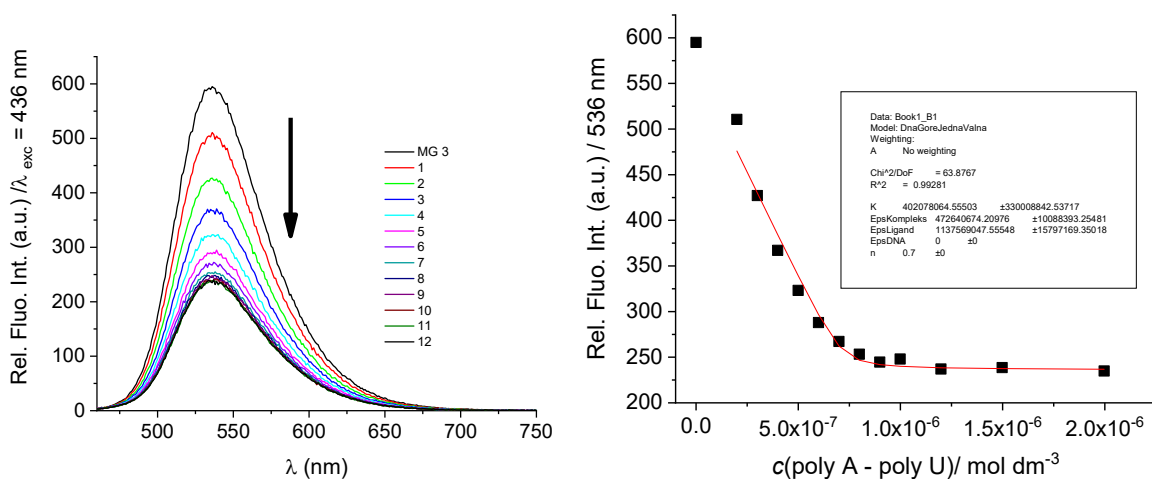

**Figure S13.** a) Changes in fluorescence spectrum of **22** ( $c = 5.0 \times 10^{-7} \text{ mol dm}^{-3}$ ,  $\lambda_{\text{exc}} = 436 \text{ nm}$ ) upon titration with rArU ( $c = 2.0 \times 10^{-7} - 2.0 \times 10^{-6} \text{ mol dm}^{-3}$ ); b) Dependence of **22** absorbance at  $\lambda_{\text{max}} = 536 \text{ nm}$  on  $c(\text{rArU})$ , at pH=7.0, sodium cacodylate buffer,  $I = 0.05 \text{ mol dm}^{-3}$ .

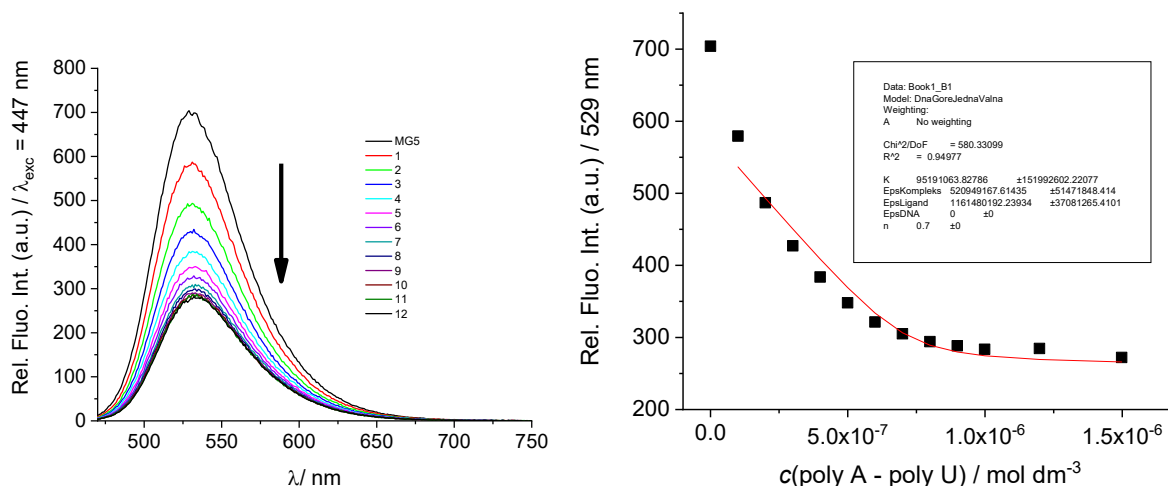

**Figure S14.** a) Changes in fluorescence spectrum of **19** ( $c = 5.0 \times 10^{-7} \text{ mol dm}^{-3}$ ,  $\lambda_{\text{exc}} = 447 \text{ nm}$ ) upon titration with rArU ( $c = 1.0 \times 10^{-7} - 1.5 \times 10^{-6} \text{ mol dm}^{-3}$ ); b) Dependence of **19** absorbance at  $\lambda_{\text{max}} = 529 \text{ nm}$  on  $c(\text{rArU})$ , at pH=7.0, sodium cacodylate buffer,  $I = 0.05 \text{ mol dm}^{-3}$ .

## 2.2. Thermal melting experiments

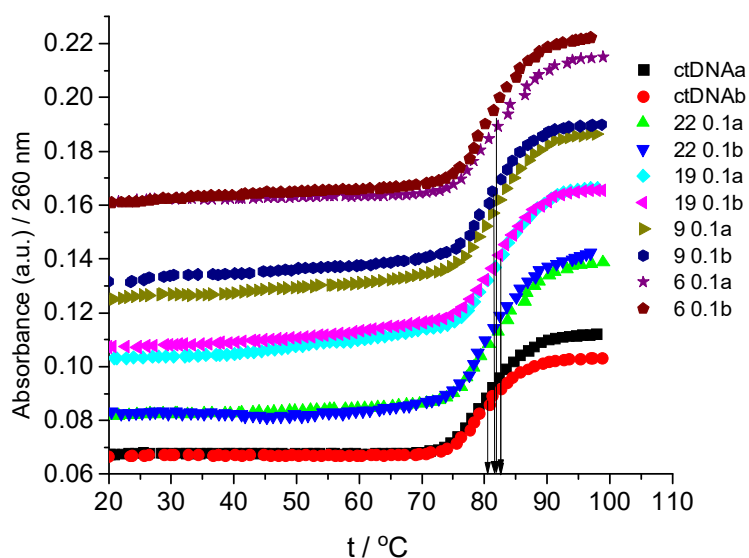

**Figure S15.** Melting curve of ctDNA upon addition of ratio,  $r$  ( $[\text{compound}] / [\text{polynucleotide}] = 0.1$  of **6**, **9**, **19** and **22** at pH = 7.0 (buffer sodium cacodylate,  $I = 0.05 \text{ mol dm}^{-3}$ ).



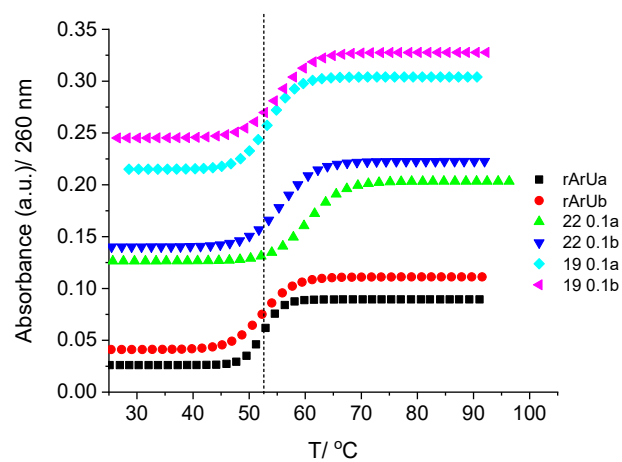

**Figure S16.** Melting curve of rArU upon addition of ratio,  $r$  ([compound]/ [polynucleotide]) = 0.1 of **19** and **22** at pH = 7.0 (buffer sodium cacodylate,  $I = 0.05 \text{ mol dm}^{-3}$ ).

### 2.3. Circular dichroism (CD) titrations

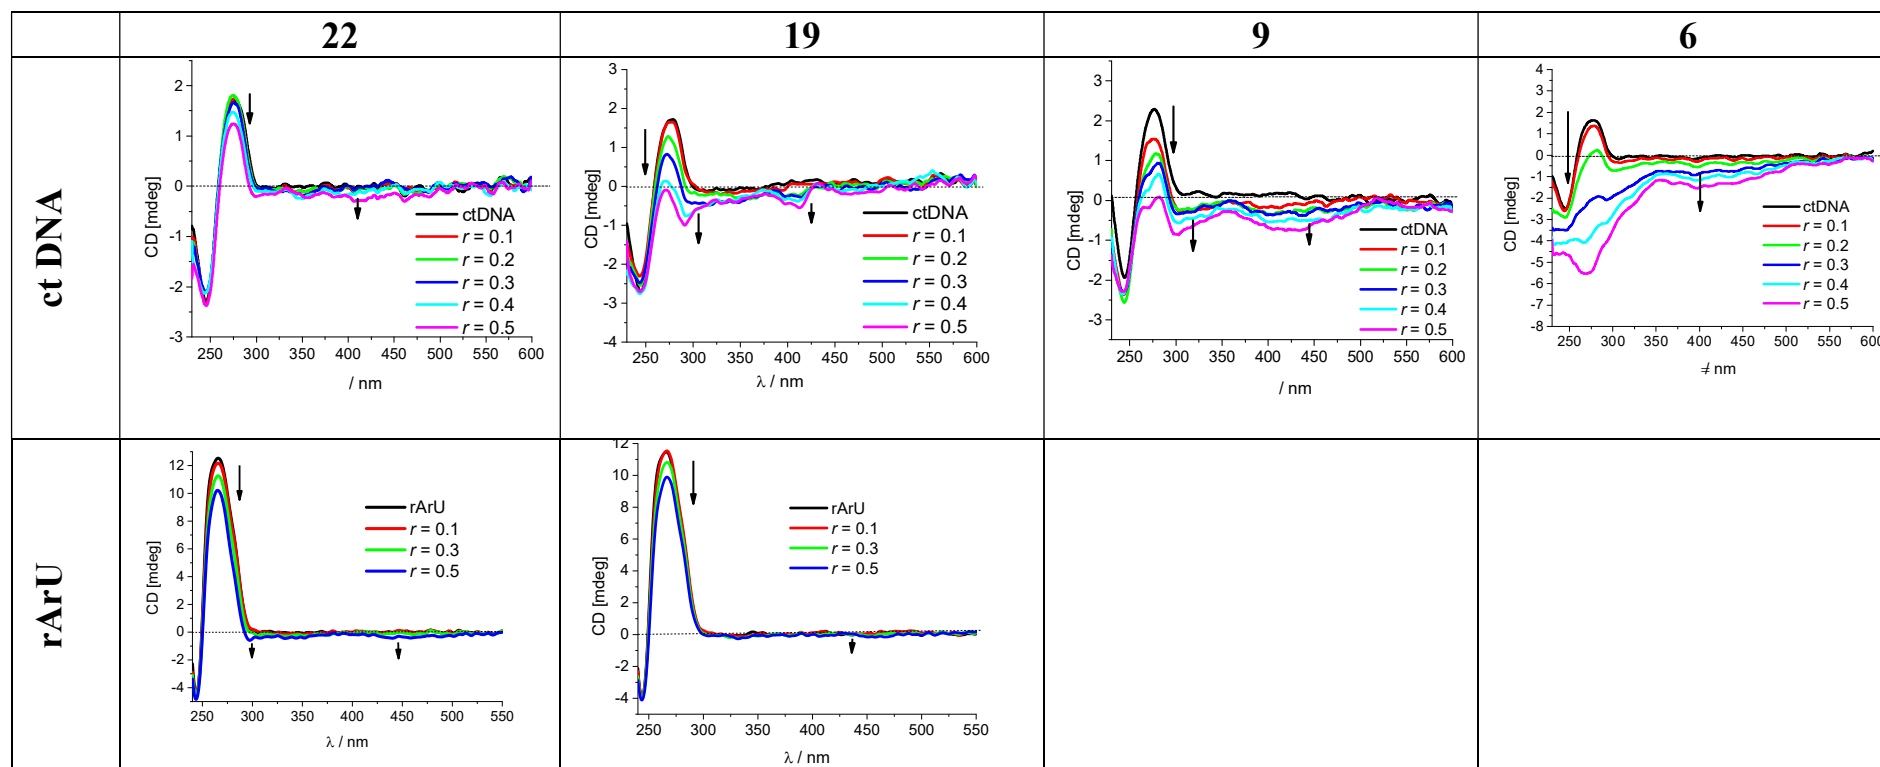

**Figure S17.** CD titration of ctDNA and rArU ( $c = 3.0 \times 10^{-5} \text{ mol dm}^{-3}$ ) with **6**, **9**, **19** and **22** at molar ratios  $r = [\text{compound}] / [\text{polynucleotide}]$  (pH = 7.0, buffer sodium cacodylate,  $I = 0.05 \text{ mol dm}^{-3}$ ).

### 3. NMR spectra of synthesized compounds

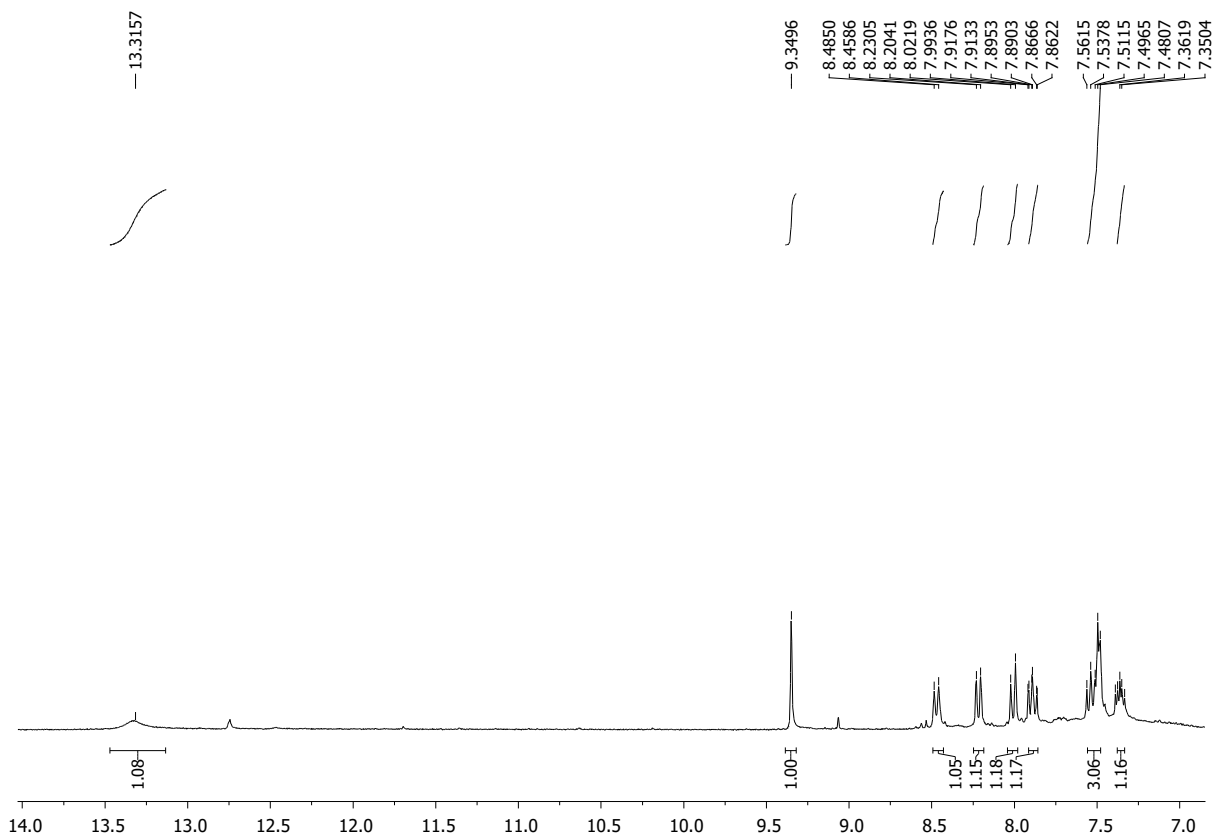

**Figure S18.**  $^1\text{H}$  NMR spectrum (DMSO- $d_6$ , 300 MHz) of 7-oxo-5,7-dihydrobenzo[g]benzo[4,5]imidazo[1,2-a][1,8]naphthyridine-6-carbonitrile **4**

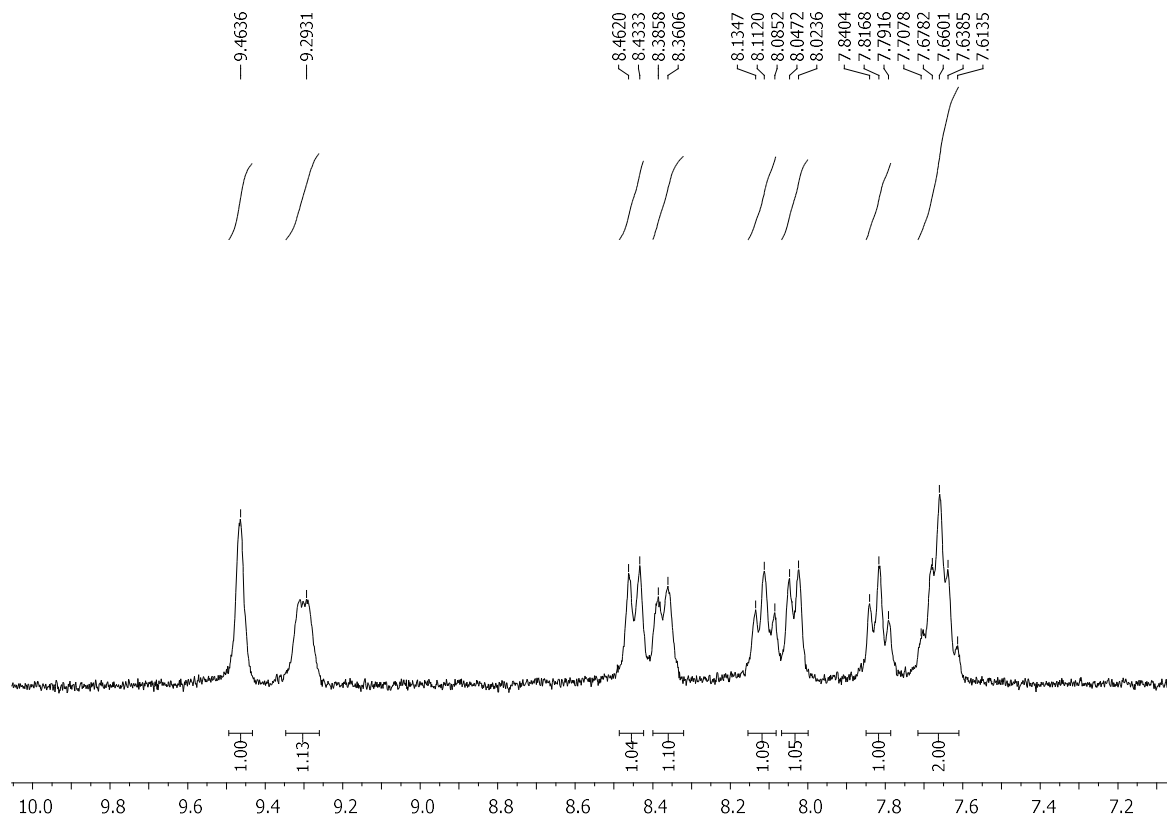

**Figure S19.**  $^1\text{H}$  NMR spectrum (DMSO- $d_6$ , 300 MHz) of 7-chlorobenzo[g]benzo[4,5]imidazo[1,2-a][1,8]naphthyridine-6-carbonitrile **5**

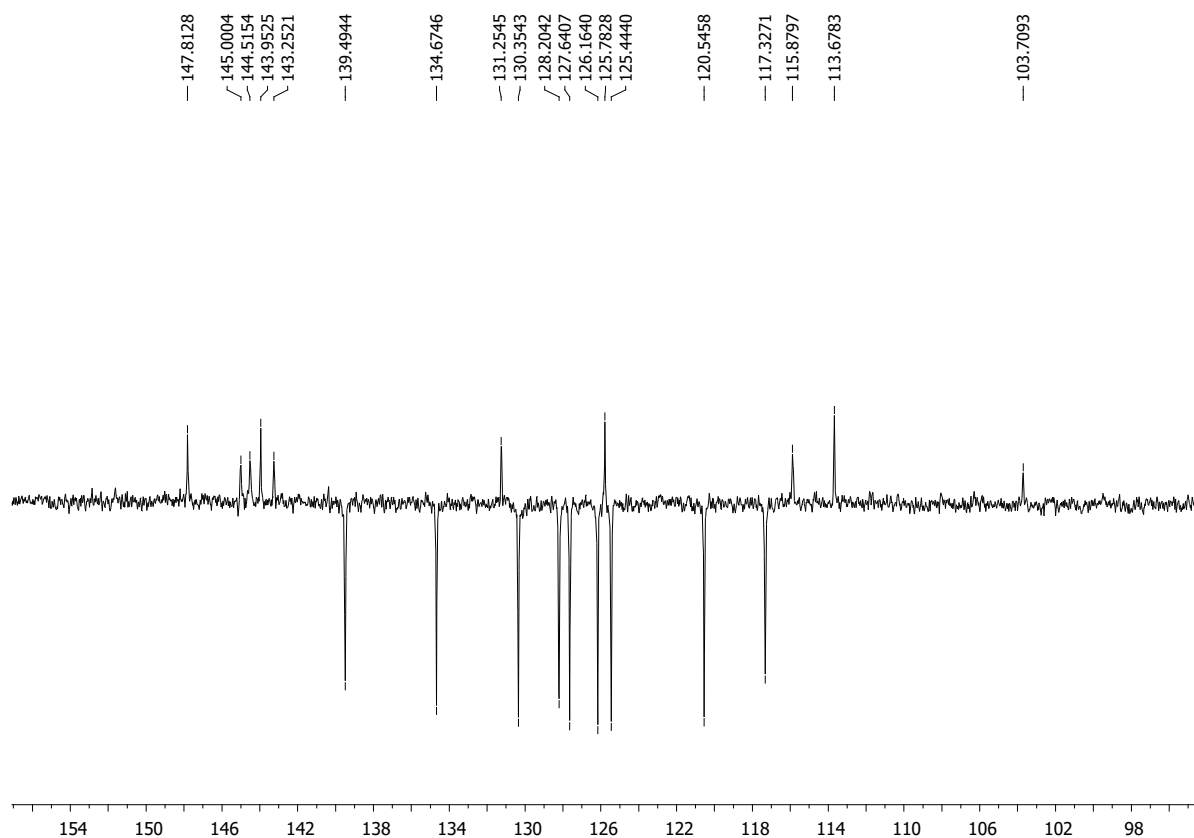

**Figure S20.**  $^{13}\text{C}$  NMR spectrum (DMSO- $d_6$ , 100 MHz) of 7-chlorobenzo[g]benzo[4,5]imidazo[1,2-a][1,8]naphthyridine-6-carbonitrile **5**

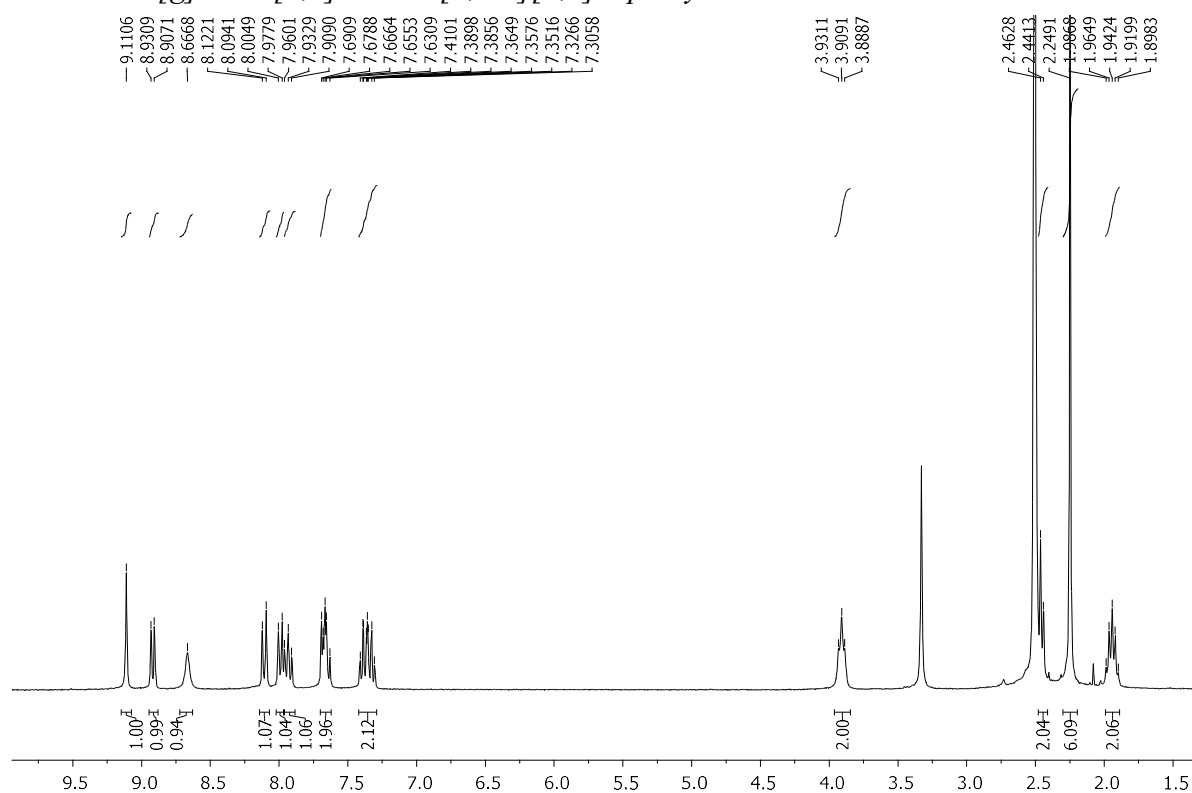

**Figure S21.**  $^1\text{H}$  NMR spectrum (DMSO- $d_6$ , 300 MHz) of 7-((3-*N,N*-(dimethylamino)propyl)amino)benzo[g]benzo[4,5]imidazo[1,2-a][1,8]naphthyridine-6-carbonitrile **6**

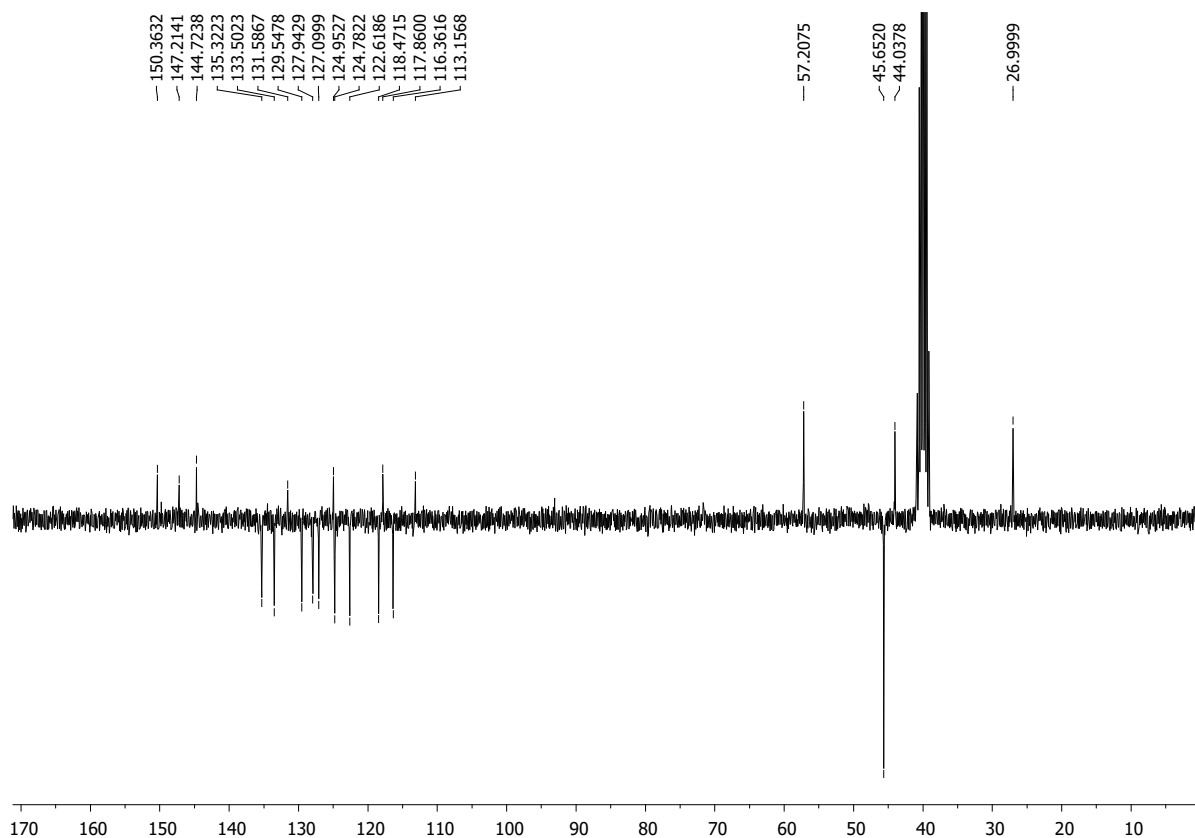

**Figure S22.**  $^{13}\text{C}$  NMR spectrum (DMSO- $d_6$ , 75 MHz) of 7-((3-*N,N*-(dimethylamino)propyl)amino)benzo[*g*]benzo[4,5]imidazo[1,2-*a*][1,8]naphthyridine-6-carbonitrile **6**

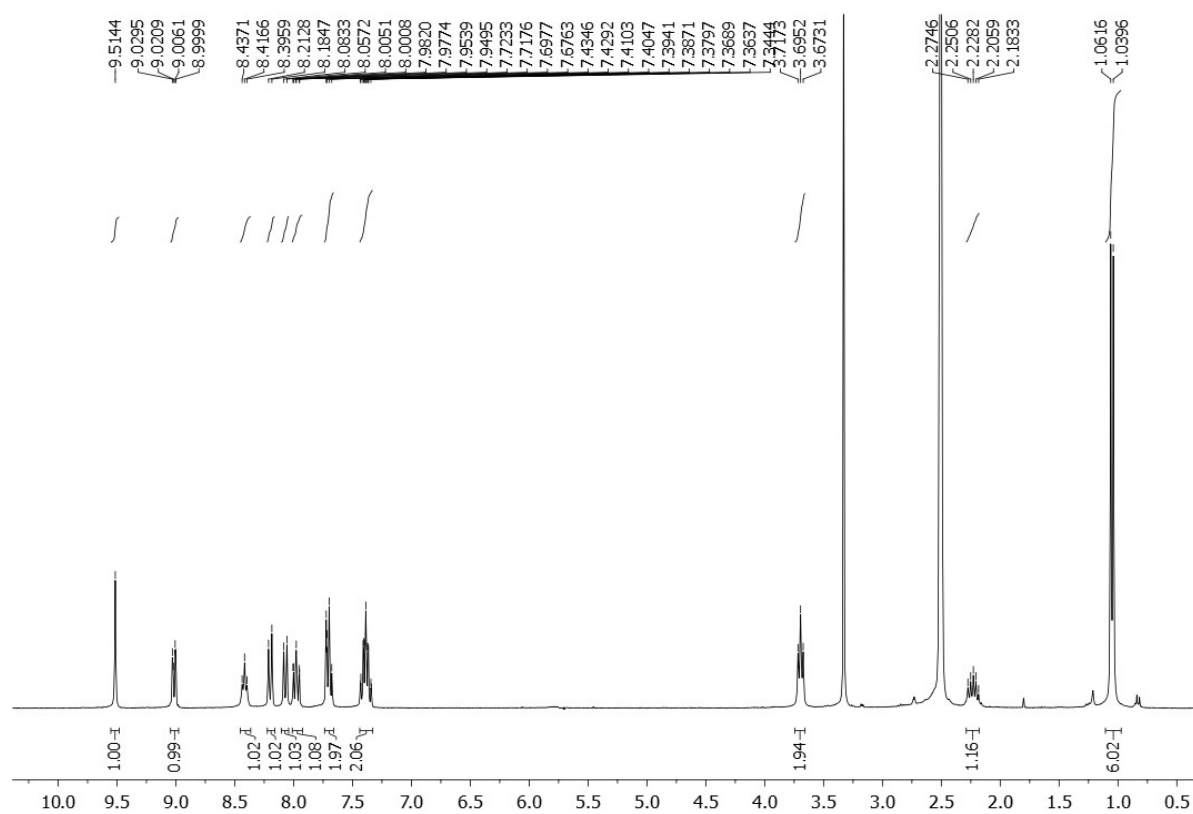

**Figure S23.**  $^1\text{H}$  NMR spectrum (DMSO- $d_6$ , 300 MHz) of 7-(*N*-isobutylamino)benzo[*g*]benzo[4,5]imidazo[1,2-*a*][1,8]naphthyridine-6-carbonitrile **7**

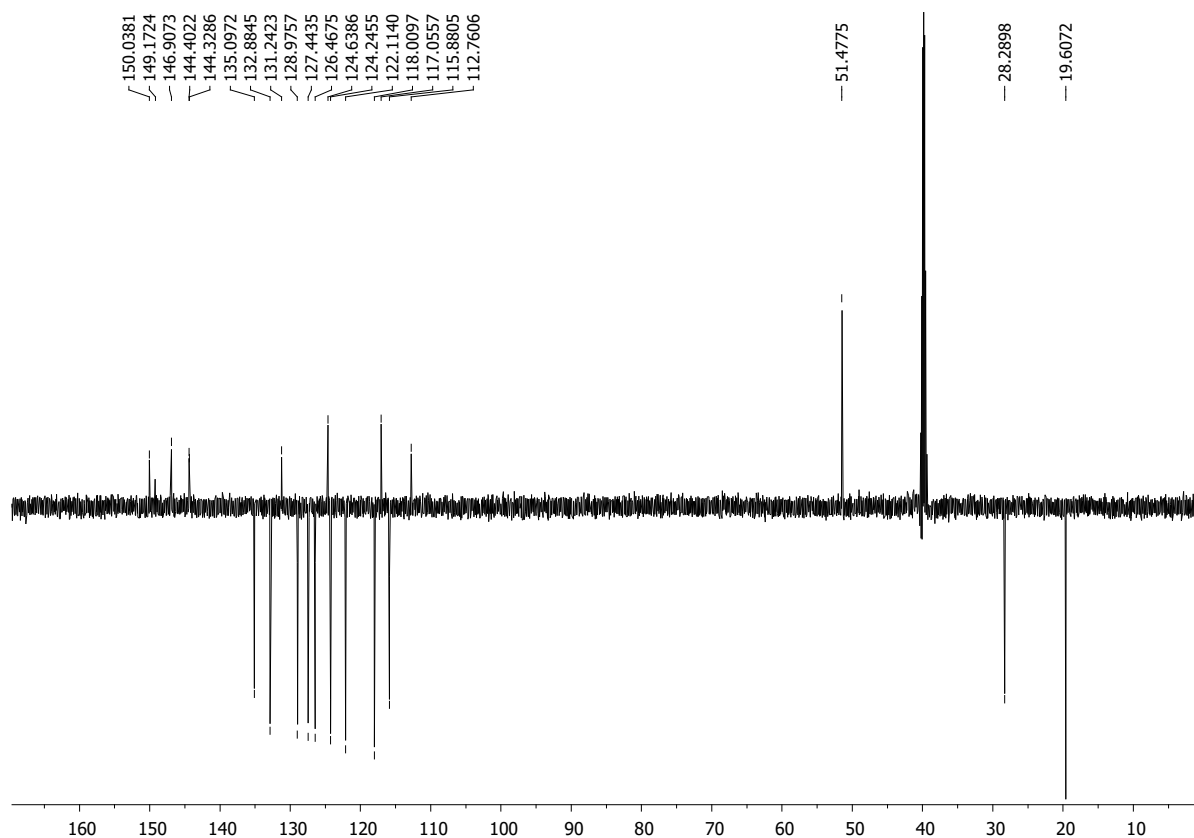

**Figure S24.**  $^{13}\text{C}$  NMR spectrum (DMSO- $d_6$ , 75 MHz) of 7-(*N*-isobutylamino)benzo[*g*]benzo[4,5]imidazo[1,2-*a*][1,8]naphthyridine-6-carbonitrile **7**

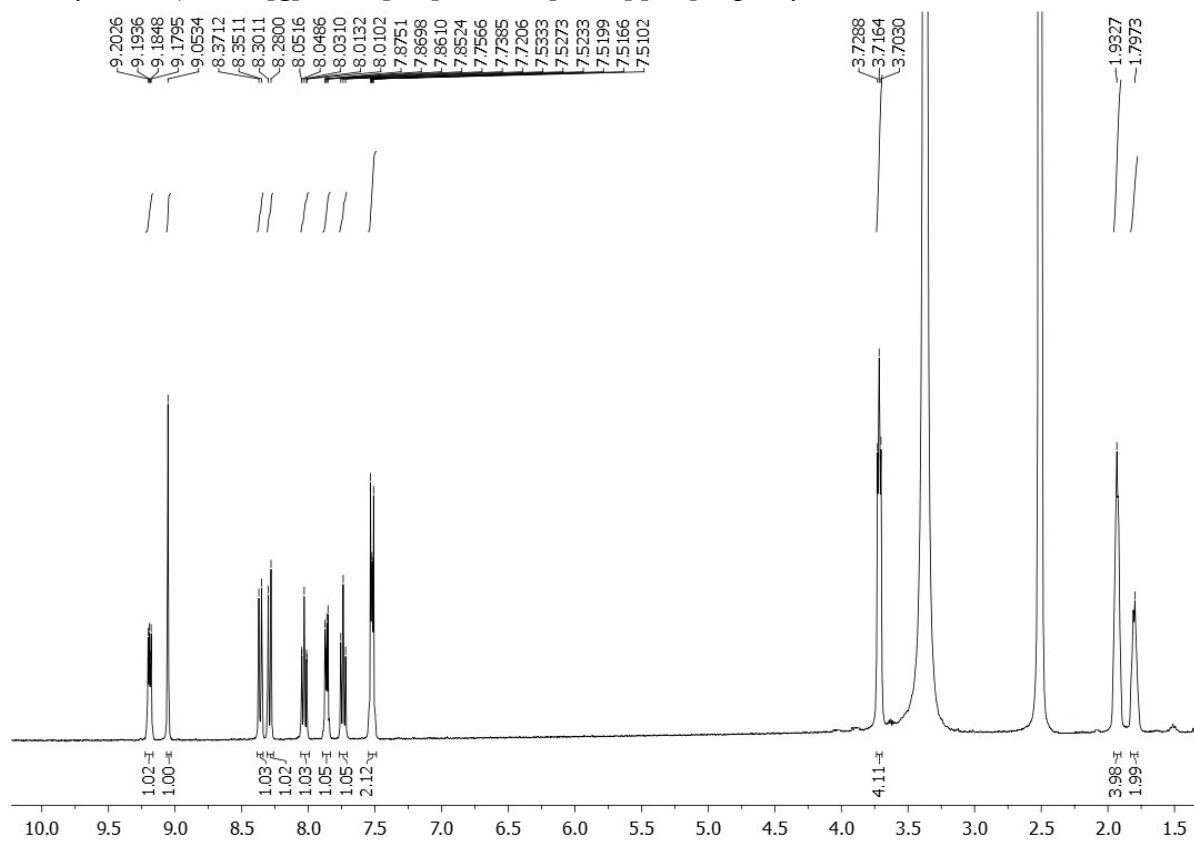

**Figure S25.**  $^1\text{H}$  NMR spectrum (DMSO- $d_6$ , 300 MHz) of 7-(piperidin-1-yl)benzo[*g*]benzo[4,5]imidazo[1,2-*a*][1,8]naphthyridine-6-carbonitrile **8**

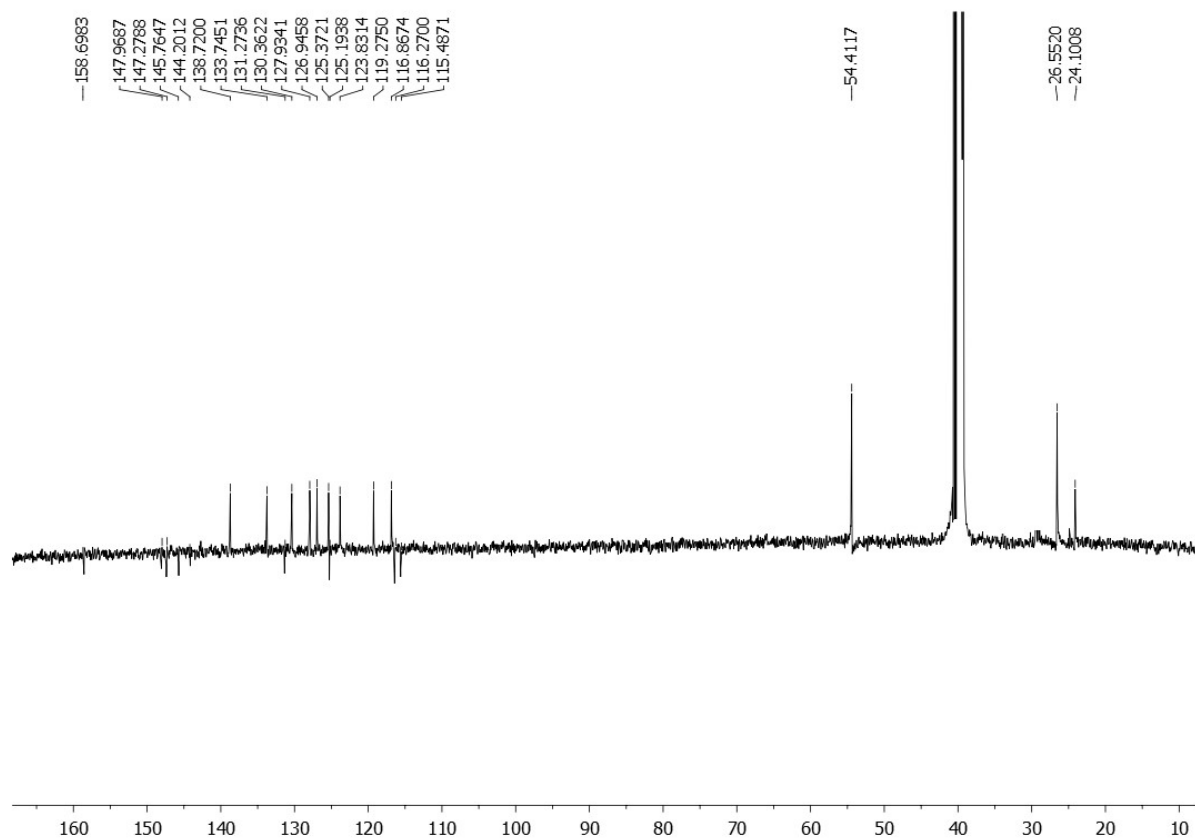

**Figure S26.**  $^{13}\text{C}$  NMR spectrum ( $\text{DMSO-}d_6$ , 75 MHz) of 7-(piperidin-1-yl)benzo[g]benzo[4,5]imidazo[1,2-a][1,8]naphthyridine-6-carbonitrile **8**

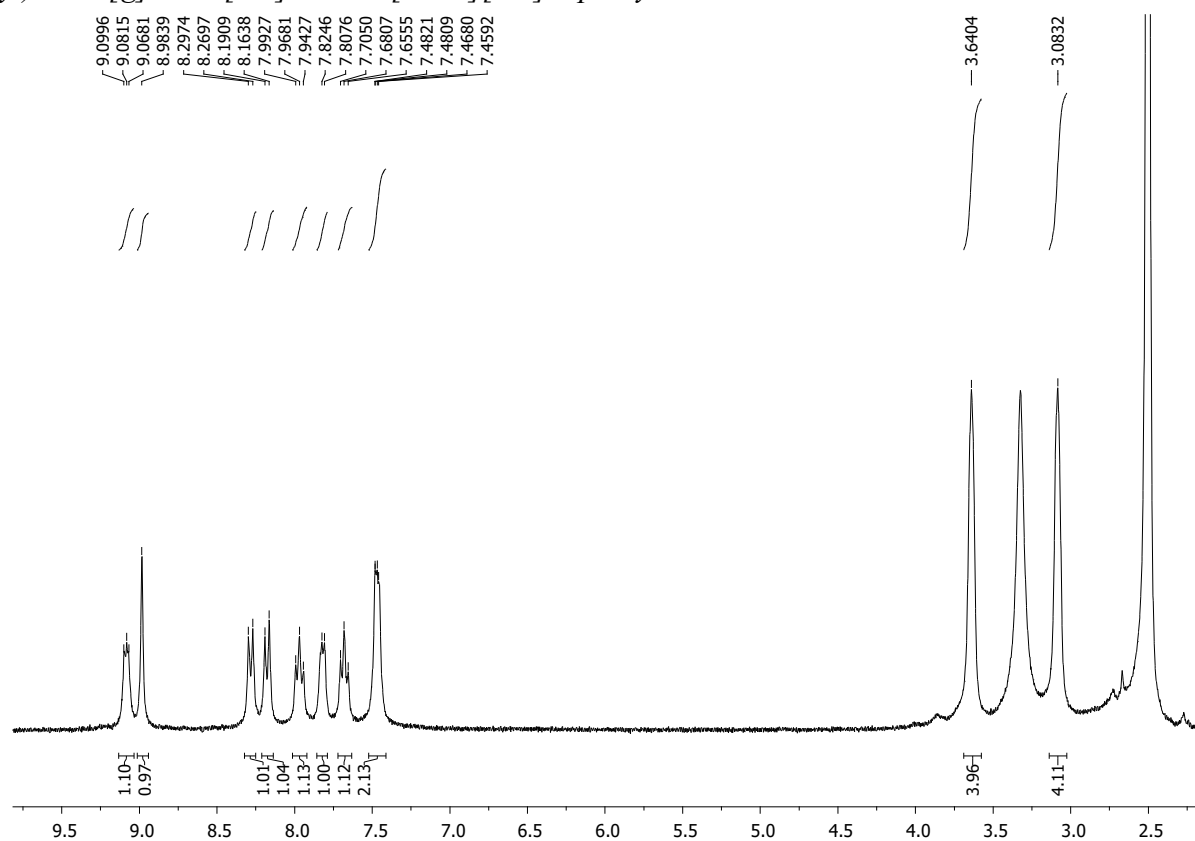

**Figure S27.**  $^1\text{H}$  NMR spectrum ( $\text{DMSO-}d_6$ , 300 MHz) of 7-(piperazin-1-yl)benzo[g]benzo[4,5]imidazo[1,2-a][1,8]naphthyridine-6-carbonitrile **9**

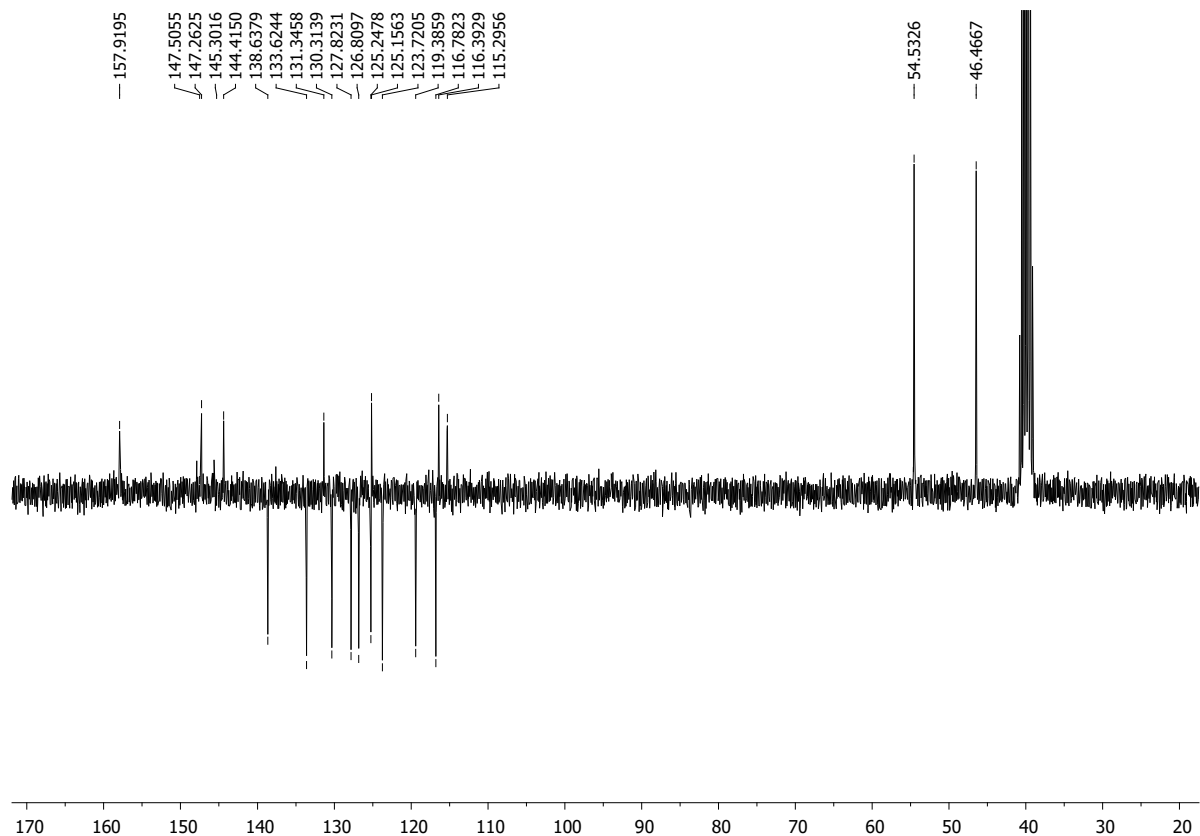

**Figure S28.** <sup>13</sup>C NMR spectrum (DMSO-*d*<sub>6</sub>, 75 MHz) of 7-(piperazin-1-yl)benzo[g]benzo[4,5]imidazo[1,2-a][1,8]naphthyridine-6-carbonitrile **9**

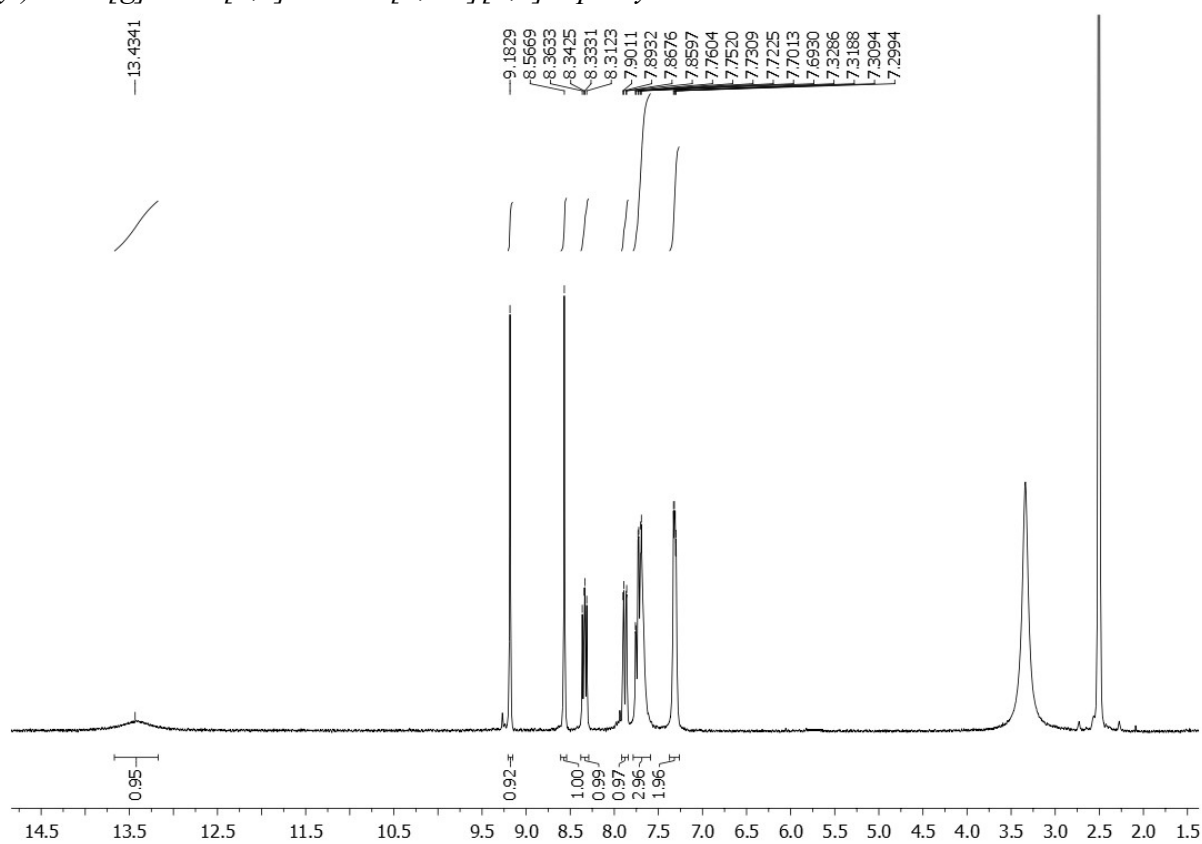

**Figure S29.** <sup>1</sup>H NMR spectrum (DMSO-*d*<sub>6</sub>, 300 MHz) of (E)-2-(1H-benzo[d]imidazol-2-yl)-3-(2-chloro-7-fluoroquinolin-3-yl)acrylonitrile **13**



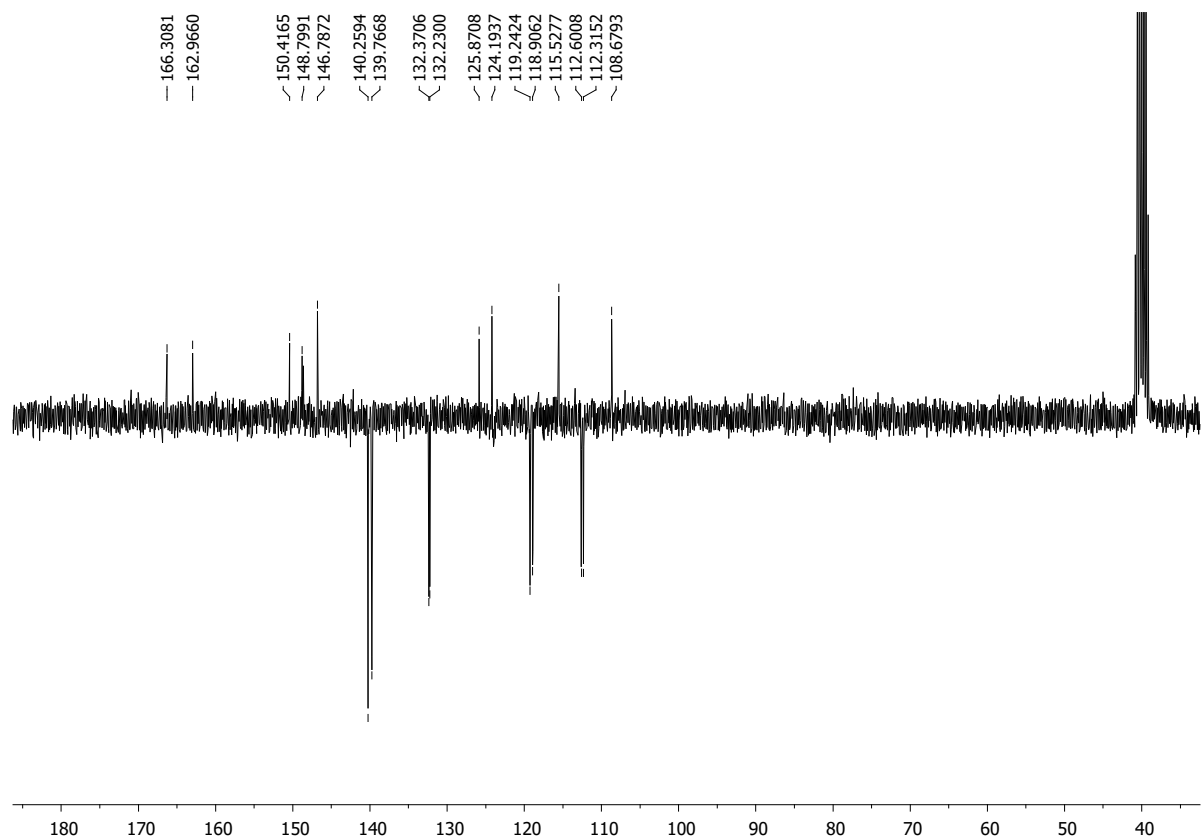

**Figure S30.**  $^{13}\text{C}$  NMR spectrum (DMSO- $d_6$ , 75 MHz) of (*E*)-2-(1*H*-benzo[*d*]imidazol-2-yl)-3-(2-chloro-7-fluoroquinolin-3-yl)acrylonitrile **13**

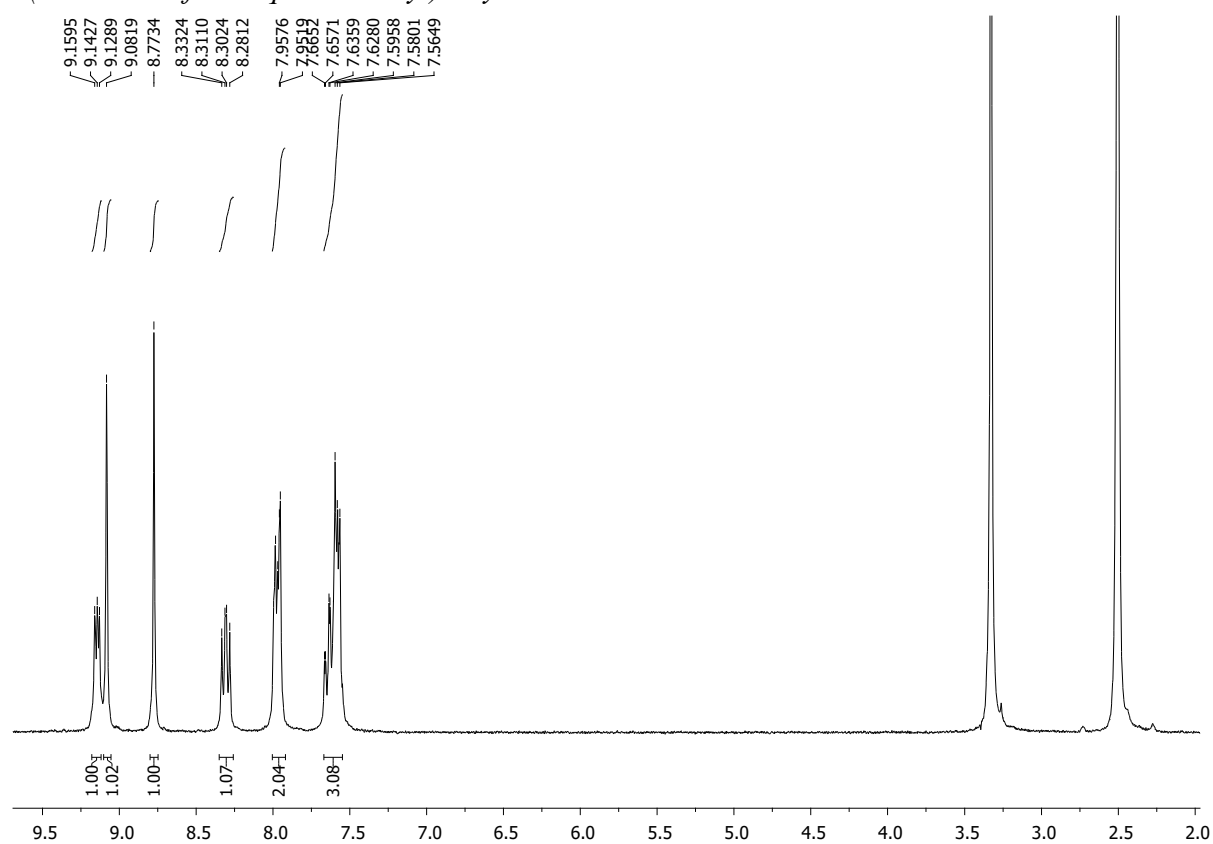

**Figure S31.**  $^1\text{H}$  NMR spectrum (DMSO- $d_6$ , 300 MHz) of 11-fluorobenzo[*g*]benzo[4,5]imidazo[1,2-*a*][1,8]naphthyridine-6-carbonitrile **16**

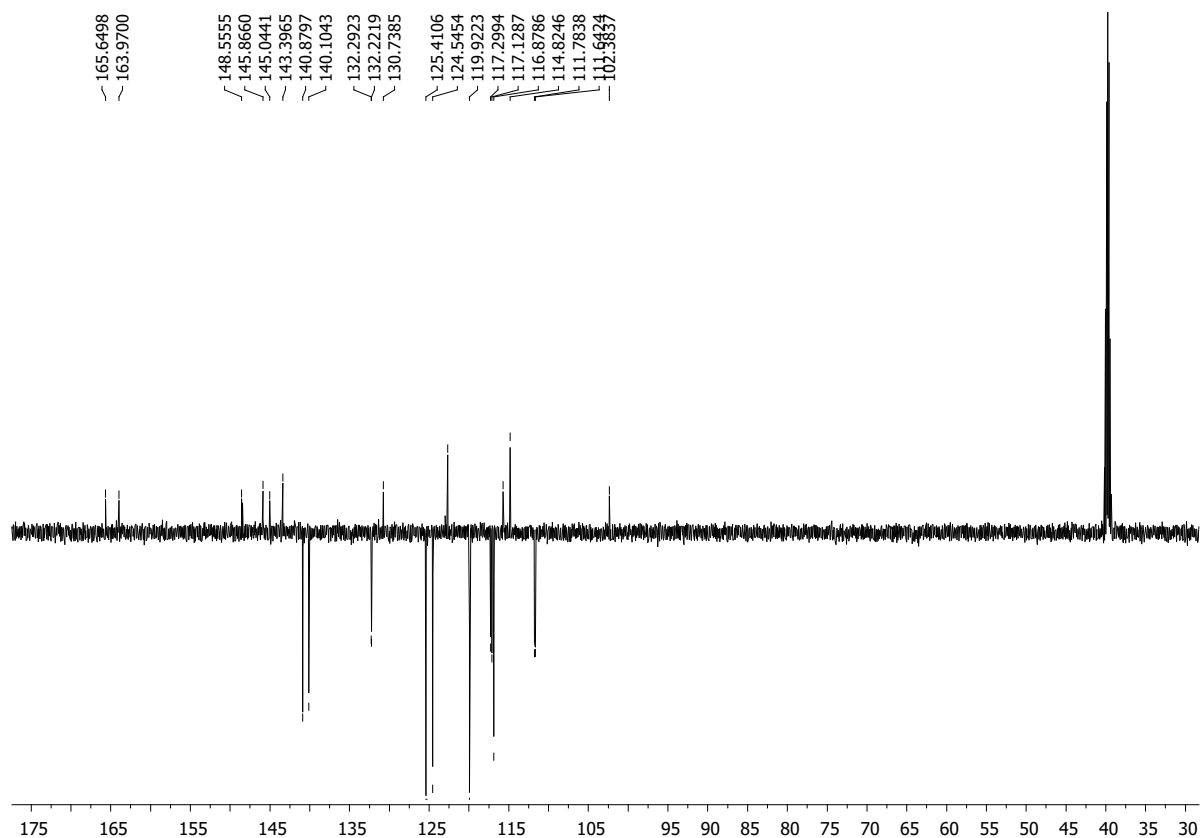

**Figure S32.** <sup>13</sup>C NMR spectrum (DMSO-*d*<sub>6</sub>, 75 MHz) of 11-fluorobenzo[*g*]benzo[4,5]imidazo[1,2-*a*][1,8]naphthyridine-6-carbonitrile **16**

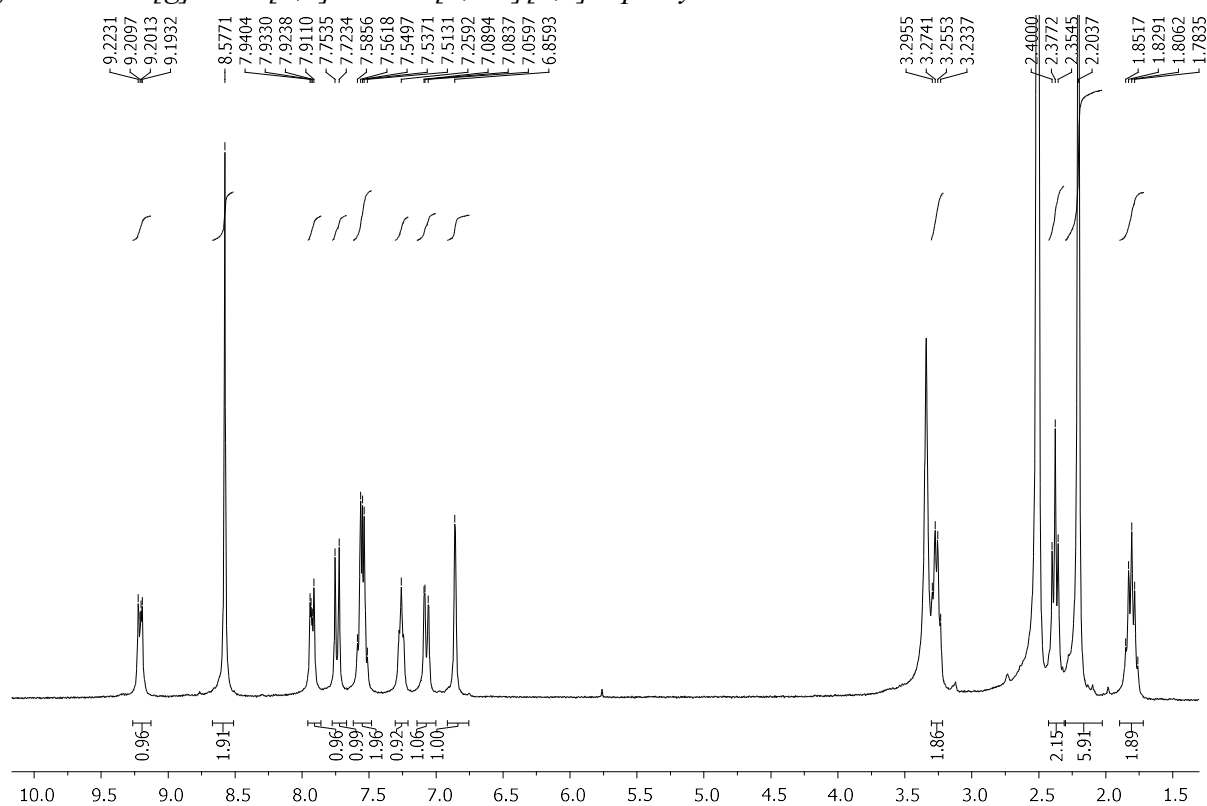

**Figure S33.** <sup>1</sup>H NMR spectrum (DMSO-*d*<sub>6</sub>, 300 MHz) of 11-((3-*N,N*-(dimethylamino)propyl)amino)benzo[*g*]benzo[4,5]imidazo[1,2-*a*][1,8]naphthyridine-6-carbonitrile **19**

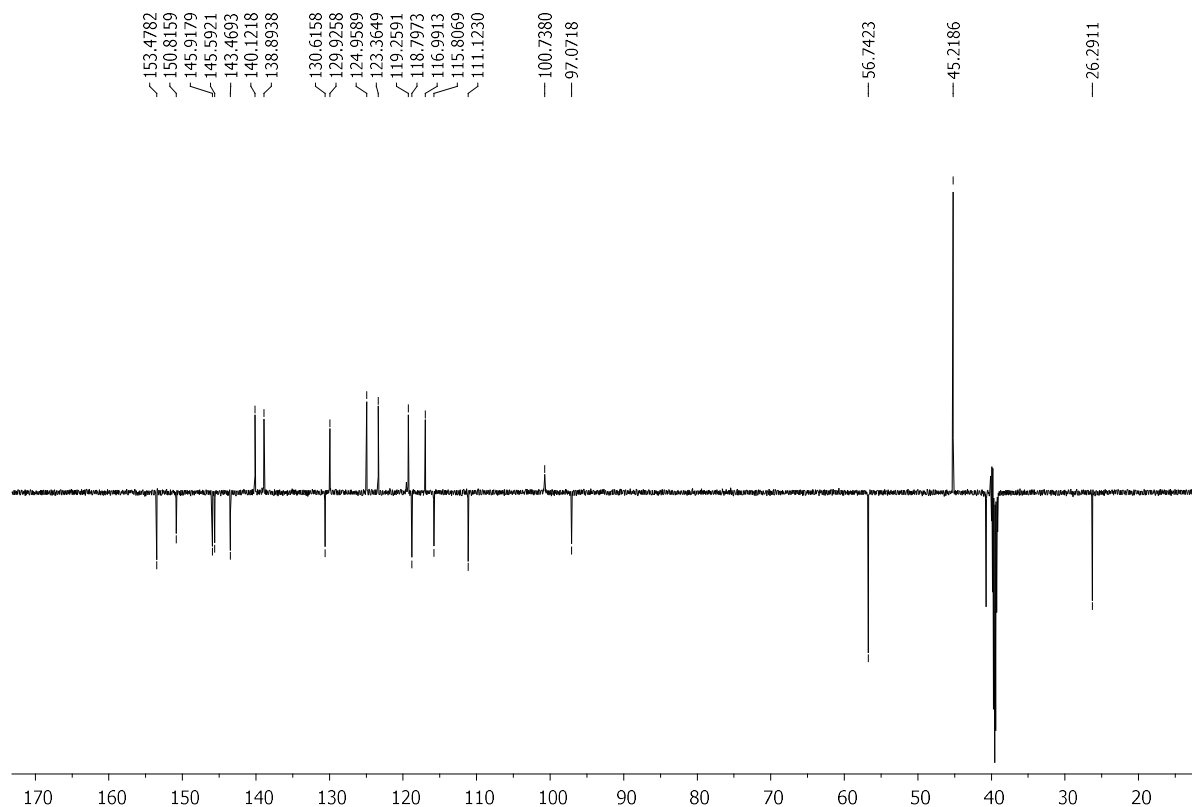

**Figure S34.**  $^{13}\text{C}$  NMR spectrum (DMSO- $d_6$ , 150 MHz) of 11-((3-*N,N*-(dimethylamino)propyl)amino)benzo[*g*]benzo[4,5]imidazo[1,2-*a*][1,8]naphthyridine-6-carbonitrile **19**

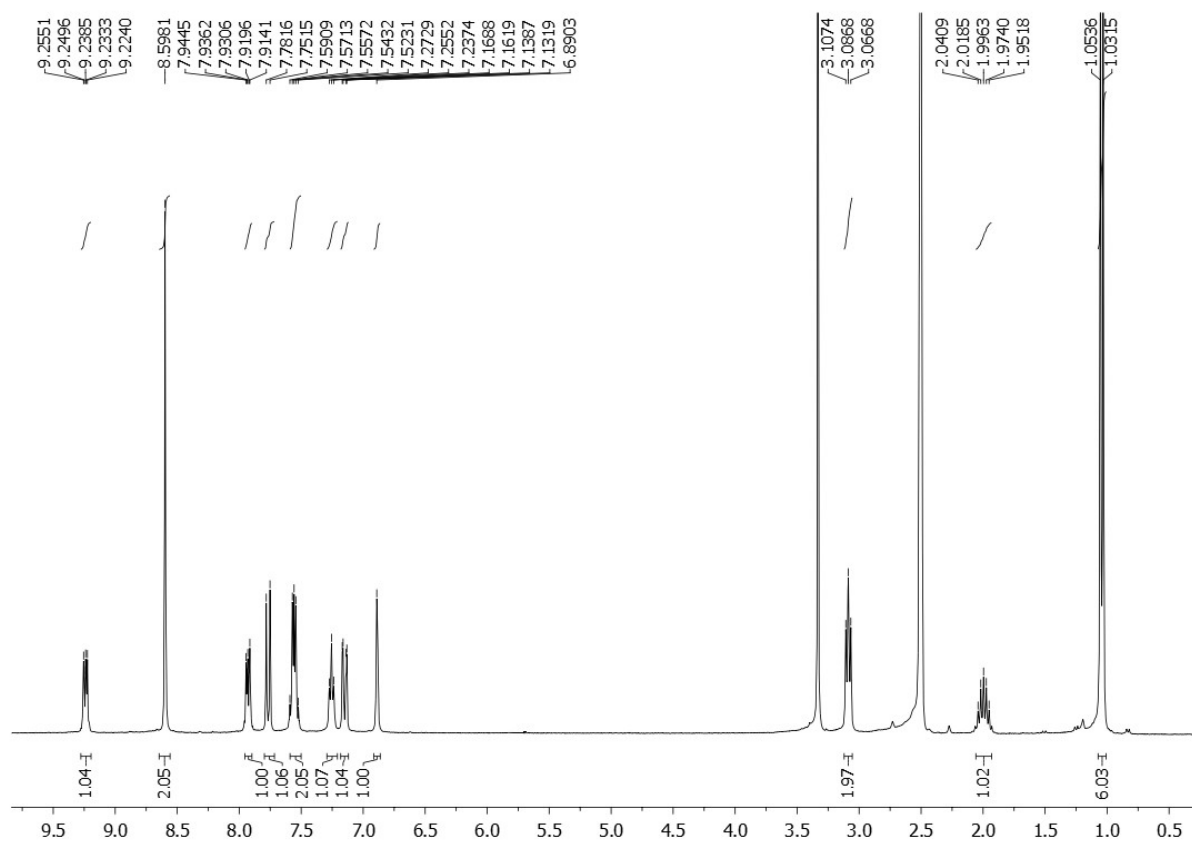

**Figure S35.**  $^1\text{H}$  NMR spectrum (DMSO- $d_6$ , 300 MHz) of 11-(*N*-isobutylamino)benzo[*g*]benzo[4,5]imidazo[1,2-*a*][1,8]naphthyridine-6-carbonitrile **20**

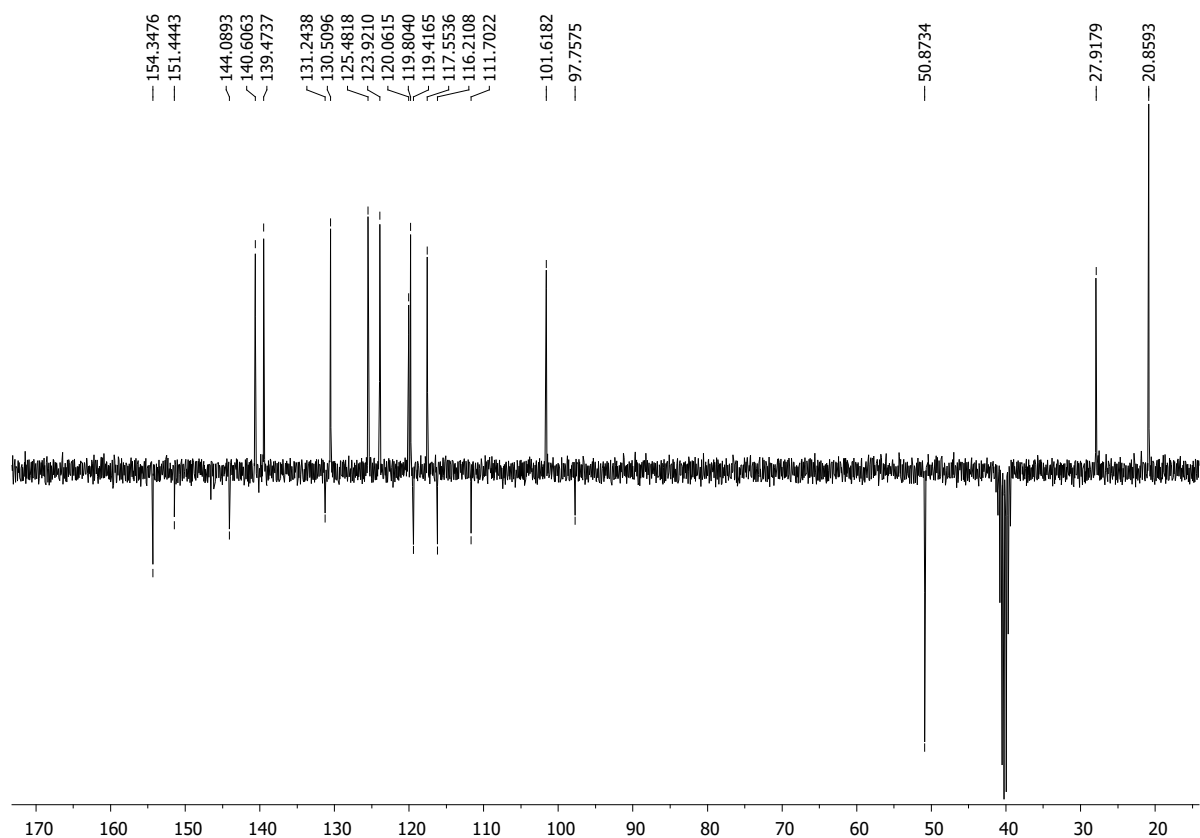

**Figure S36.**  $^{13}\text{C}$  NMR spectrum (DMSO- $d_6$ , 75 MHz) of 11-(*N*-isobutylamino)benzo[*g*]benzo[4,5]imidazo[1,2-*a*][1,8]naphthyridine-6-carbonitrile **20**

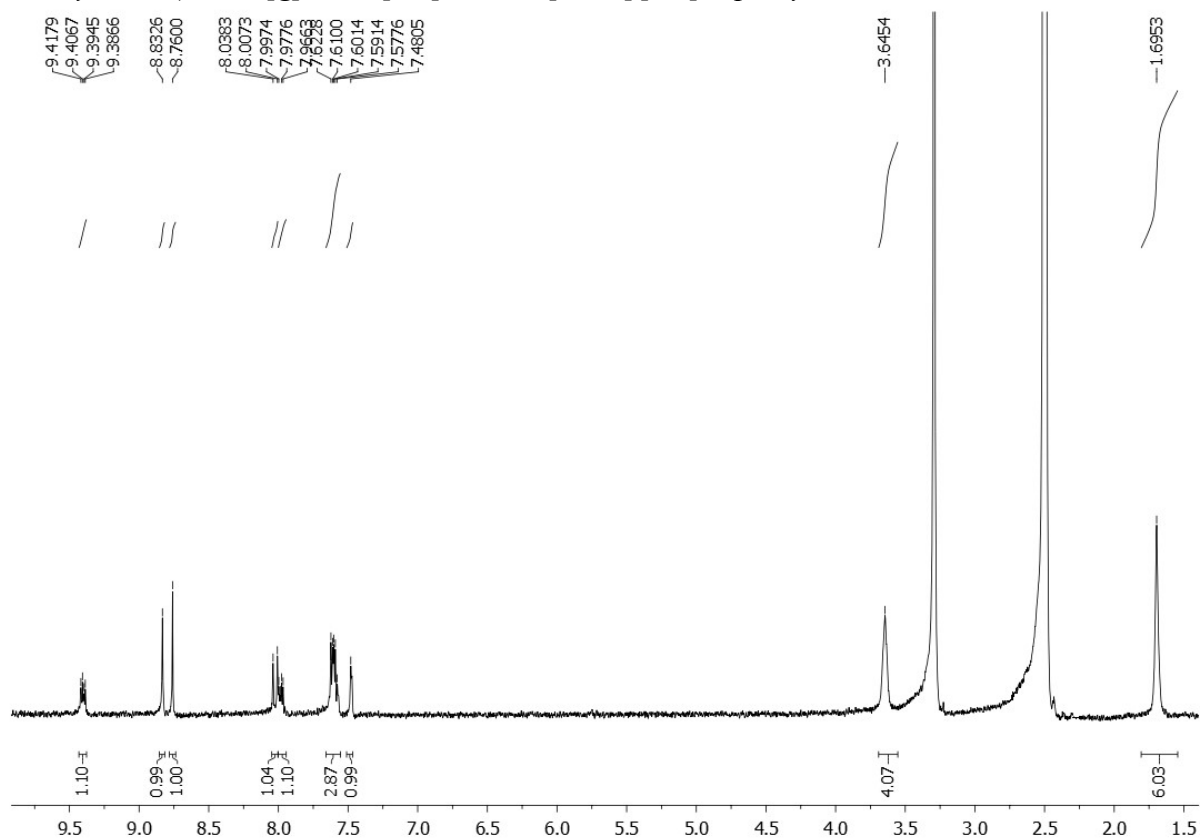

**Figure S37.**  $^1\text{H}$  NMR spectrum (DMSO- $d_6$ , 300 MHz) of 11-(piperidin-1-yl)benzo[*g*]benzo[4,5]imidazo[1,2-*a*][1,8]naphthyridine-6-carbonitrile **21**

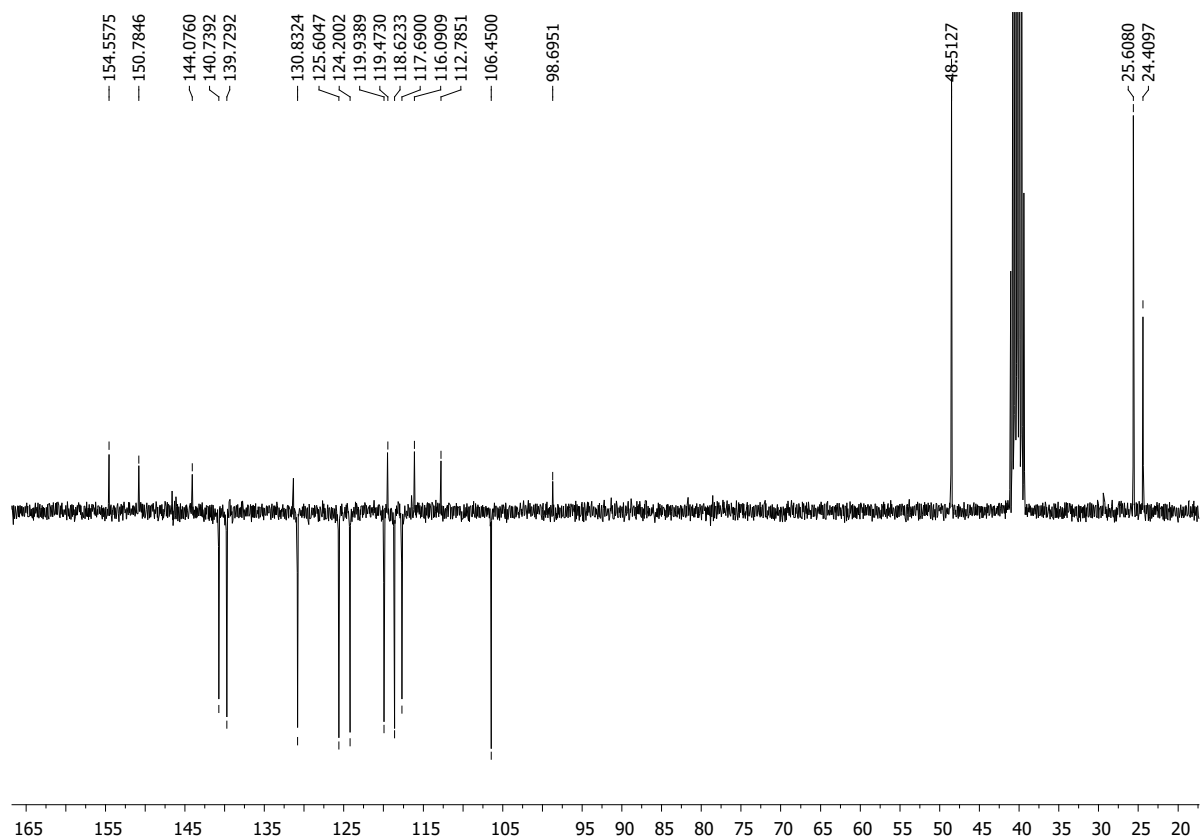

**Figure S38.**  $^{13}\text{C}$  NMR spectrum (DMSO- $d_6$ , 75 MHz) of 11-(piperidin-1-yl)benzo[g]benzo[4,5]imidazo[1,2-a][1,8]naphthyridine-6-carbonitrile **21**

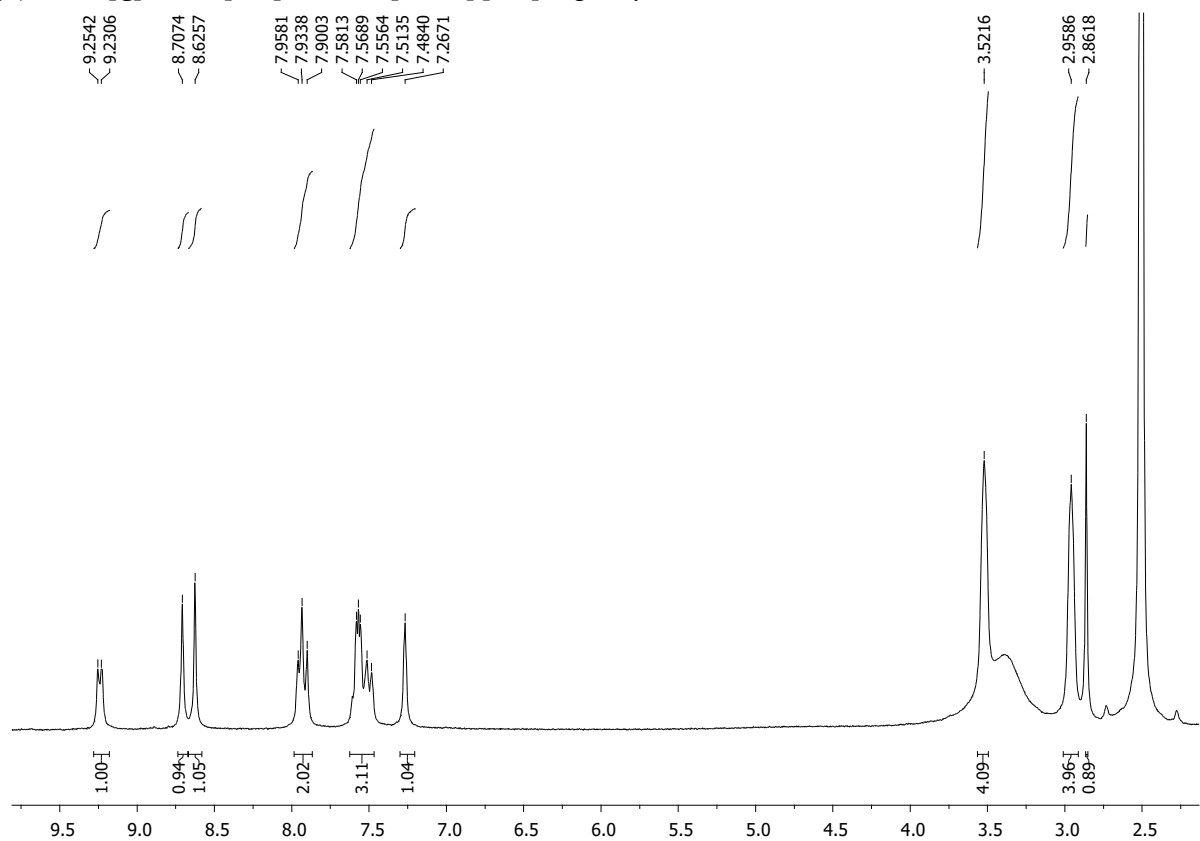

**Figure S39.**  $^1\text{H}$  NMR spectrum (DMSO- $d_6$ , 300 MHz) of 11-(piperazin-1-yl)benzo[g]benzo[4,5]imidazo[1,2-a][1,8]naphthyridine-6-carbonitrile **22**

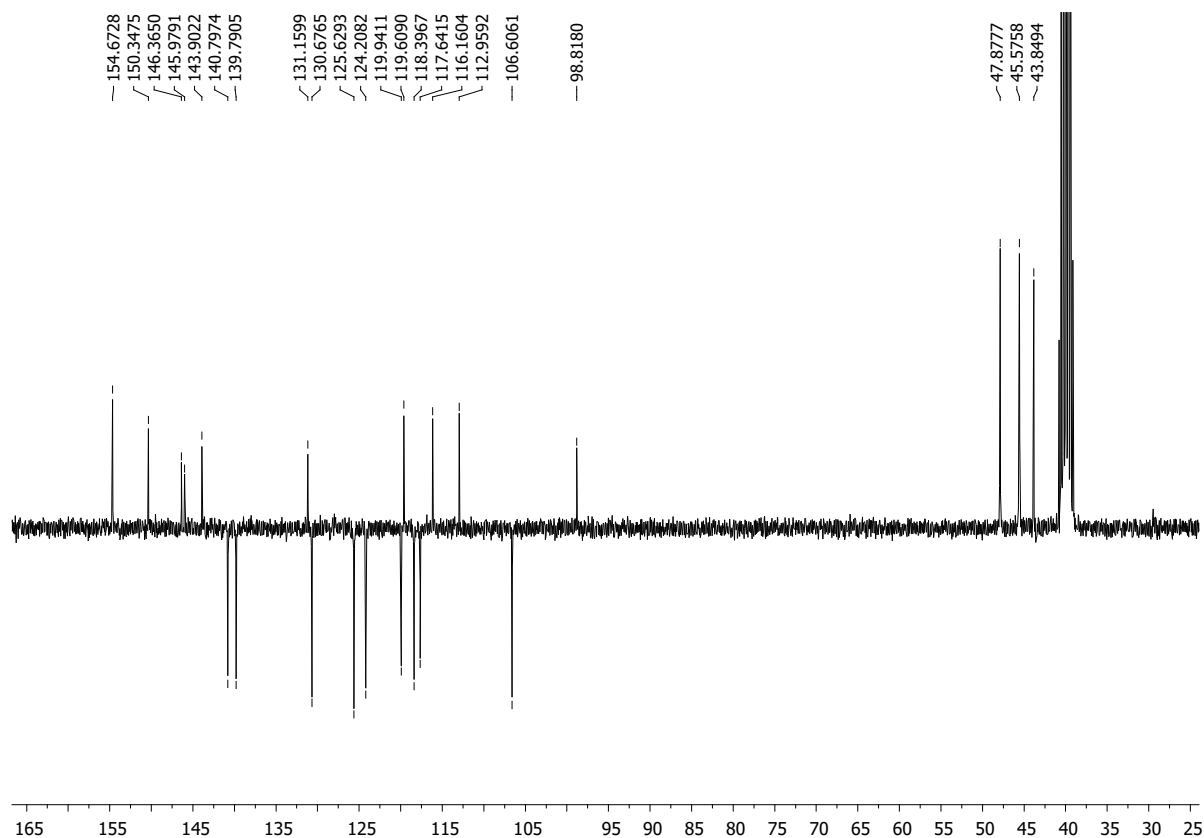

**Figure S40.** <sup>13</sup>C NMR spectrum (DMSO-*d*<sub>6</sub>, 75 MHz) of 11-(piperazin-1-yl)benzo[*g*]benzo[4,5]imidazo[1,2-*a*][1,8]naphthyridine-6-carbonitrile **22**

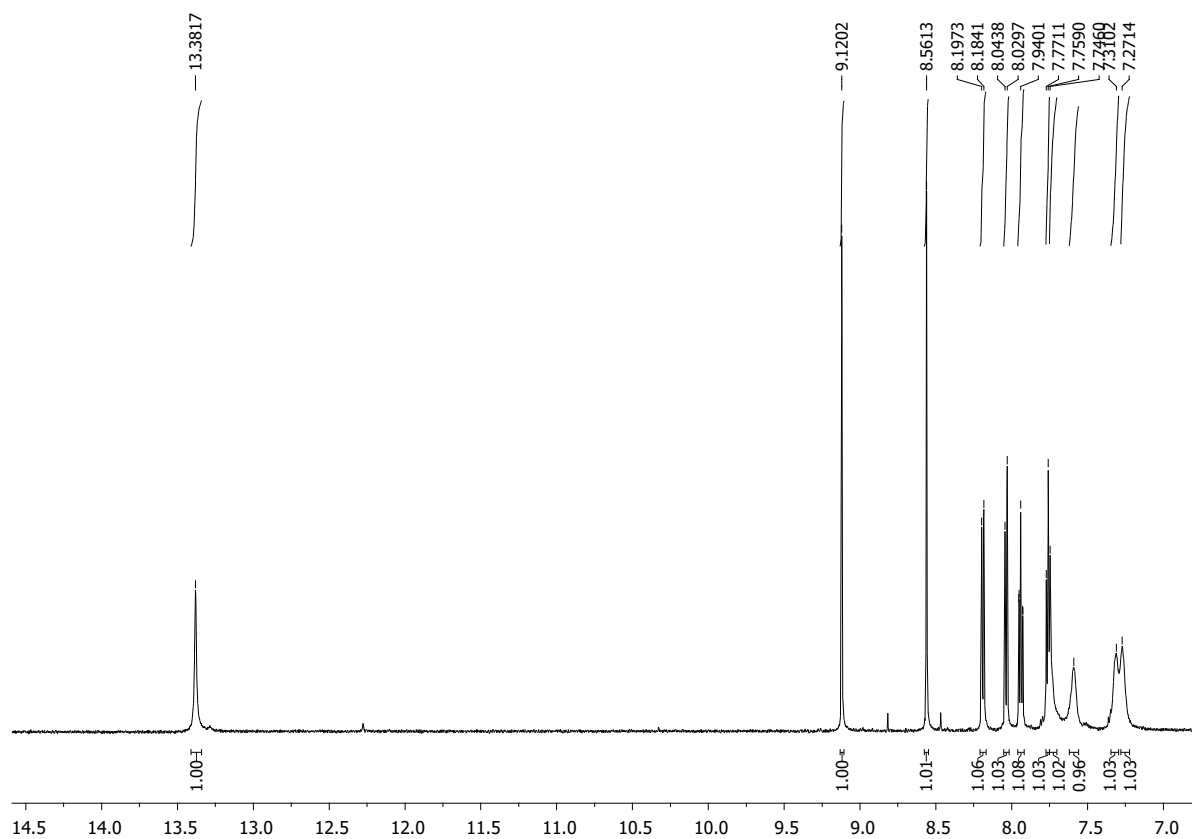

**Figure S41.** <sup>1</sup>H NMR spectrum (DMSO-*d*<sub>6</sub>, 600 MHz) of (*E*)-2-(1*H*-benzo[*d*]imidazol-2-yl)-3-(2-chloroquinolin-3-yl)acrylonitrile **14**

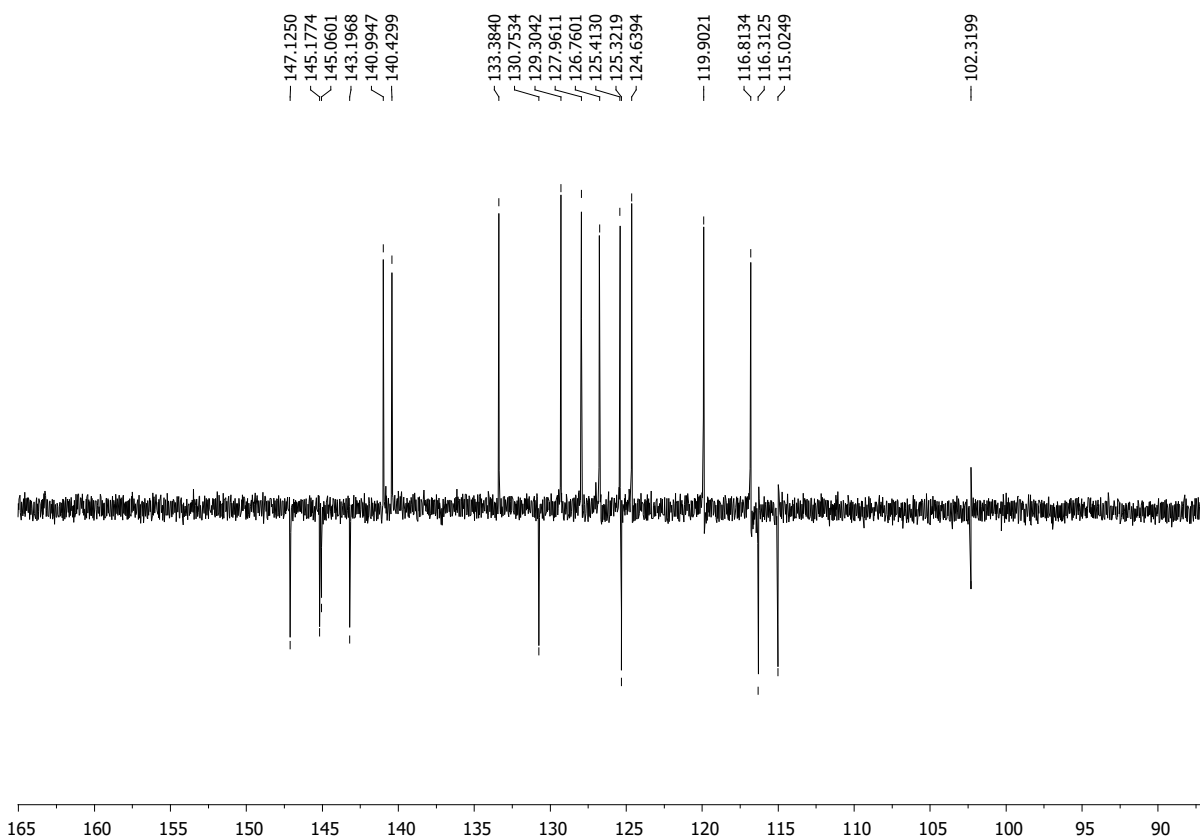

**Figure S42.**  $^{13}\text{C}$  NMR spectrum (DMSO- $d_6$ , 150 MHz) of *(E)*-2-(1*H*-benzo[*d*]imidazol-2-yl)-3-(2-chloroquinolin-3-yl)acrylonitrile **14**

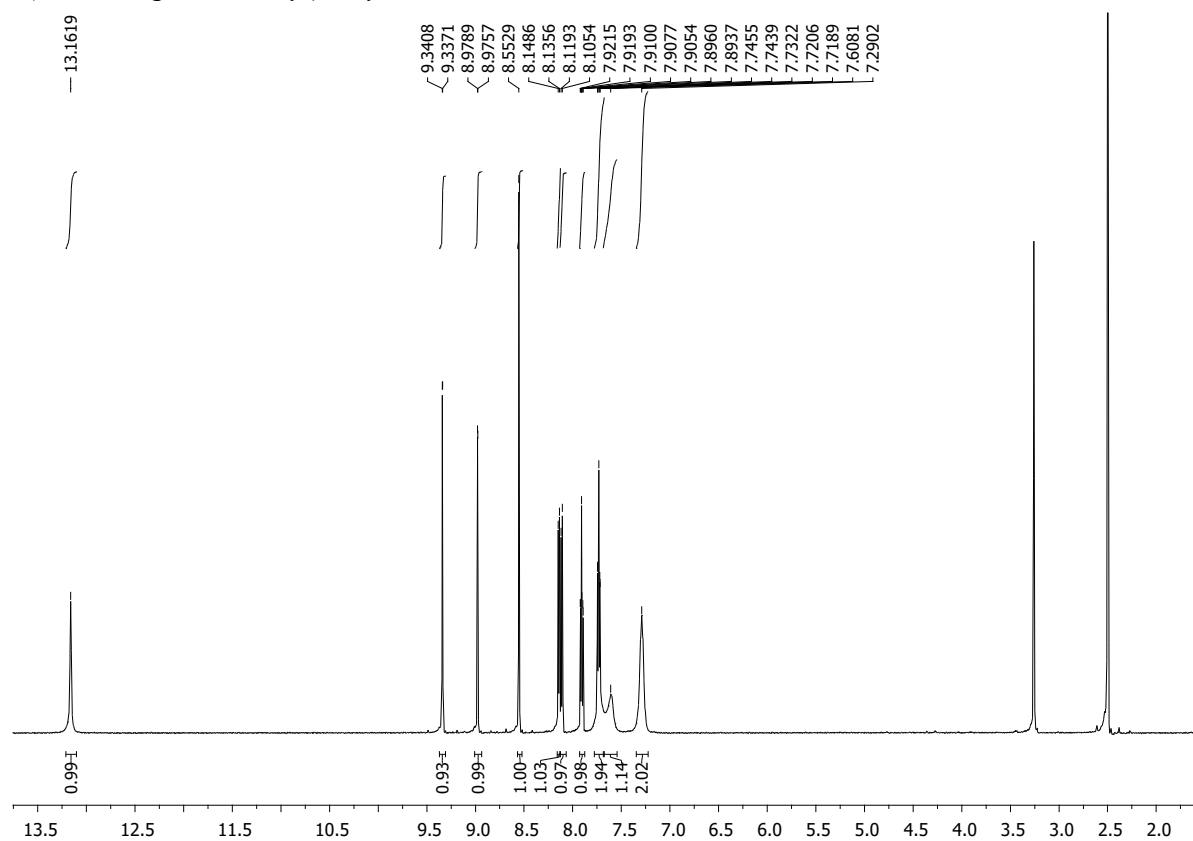

**Figure S43.**  $^1\text{H}$  NMR spectrum (DMSO- $d_6$ , 600 MHz) of *(E)*-2-(1*H*-benzo[*d*]imidazol-2-yl)-3-(quinolin-3-yl)acrylonitrile **15**

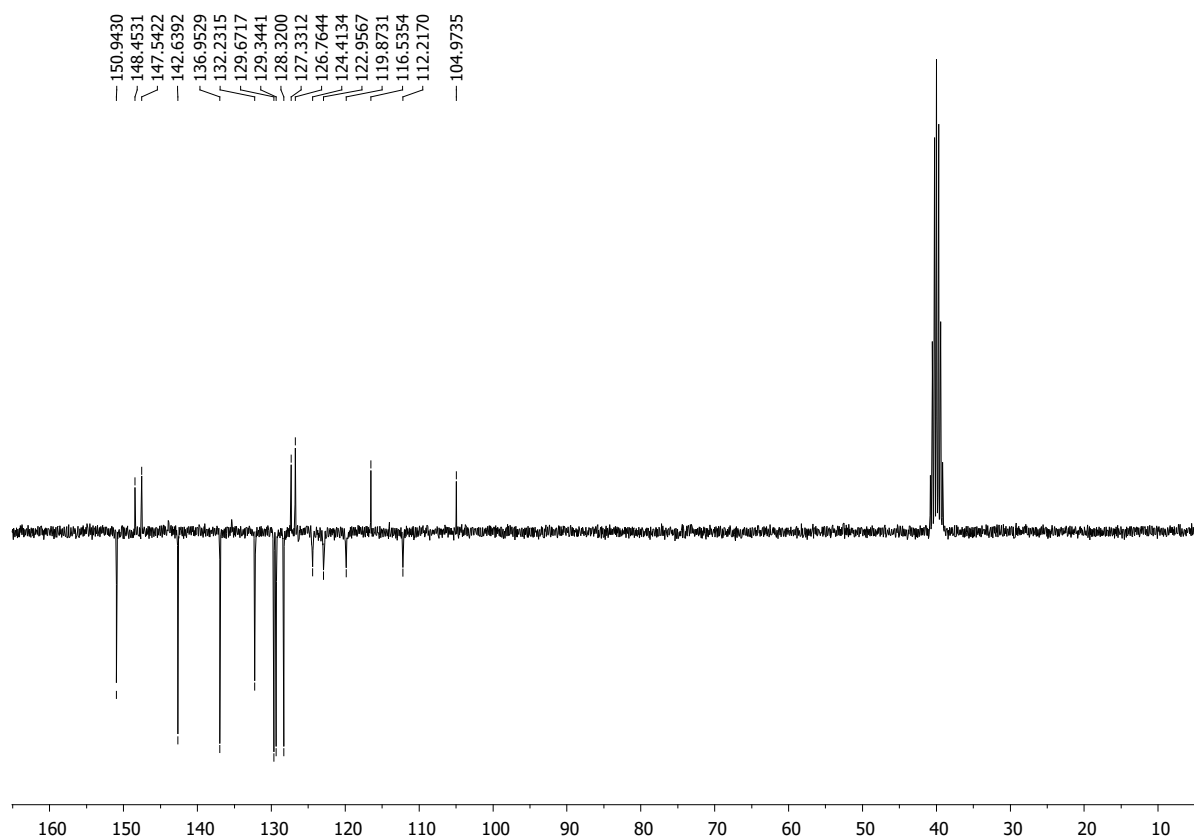

**Figure S44.**  $^{13}\text{C}$  NMR spectrum (DMSO- $d_6$ , 75 MHz) of (*E*)-2-(1*H*-benzo[*d*]imidazol-2-yl)-3-(quinolin-3-yl)acrylonitrile **15**

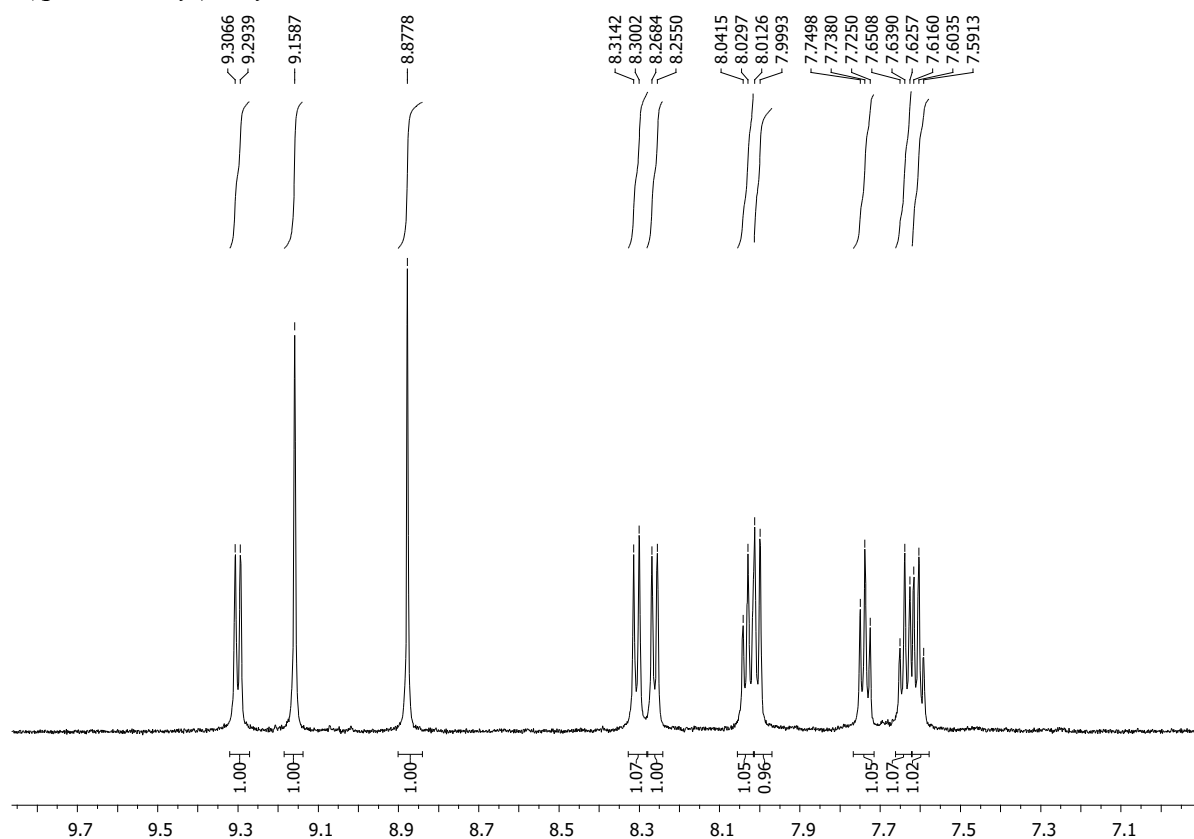

**Figure S45.**  $^1\text{H}$  NMR spectrum (DMSO- $d_6$ , 600 MHz) of benzo[*g*]benzo[4,5]imidazo[1,2-*a*][1,8]naphthyridine-6-carbonitrile **17**



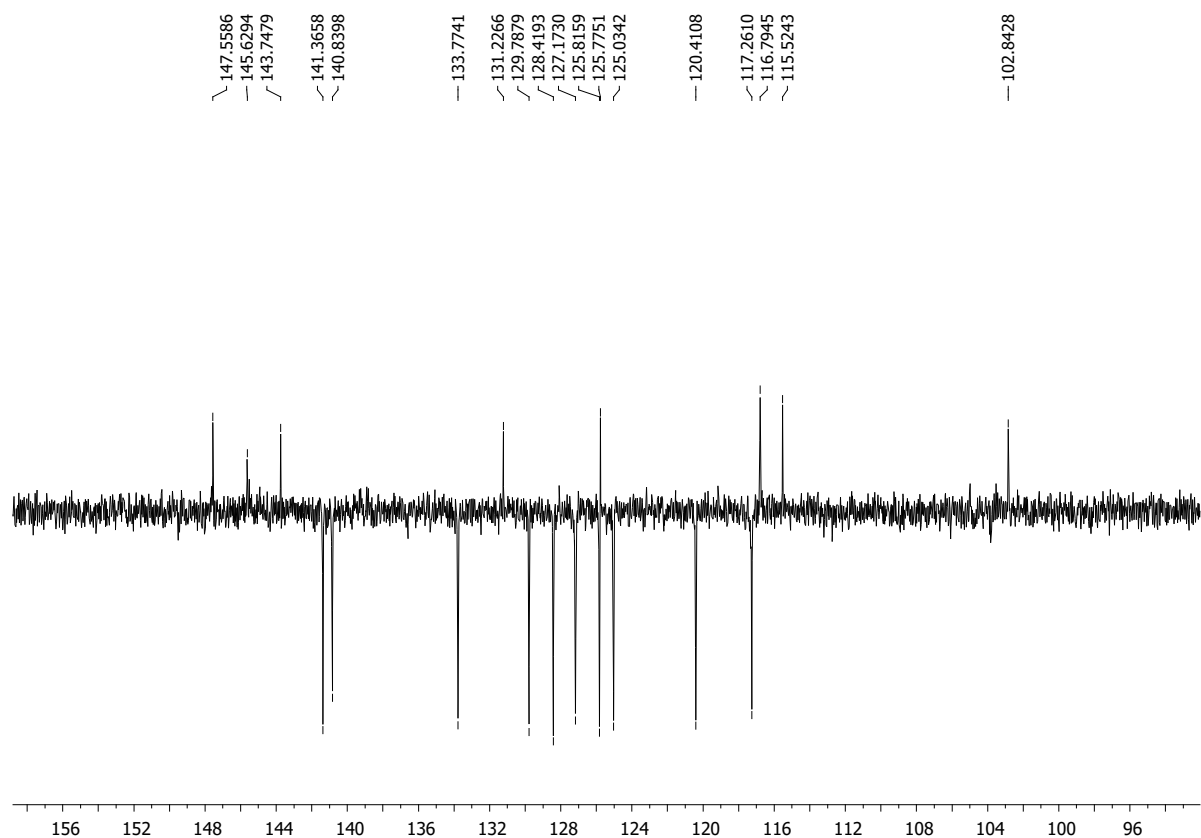

**Figure S46.**  $^{13}\text{C}$  NMR spectrum (DMSO- $d_6$ , 75 MHz) of *benzo[g]benzo[4,5]imidazo[1,2-a][1,8]naphthyridine-6-carbonitrile 17*

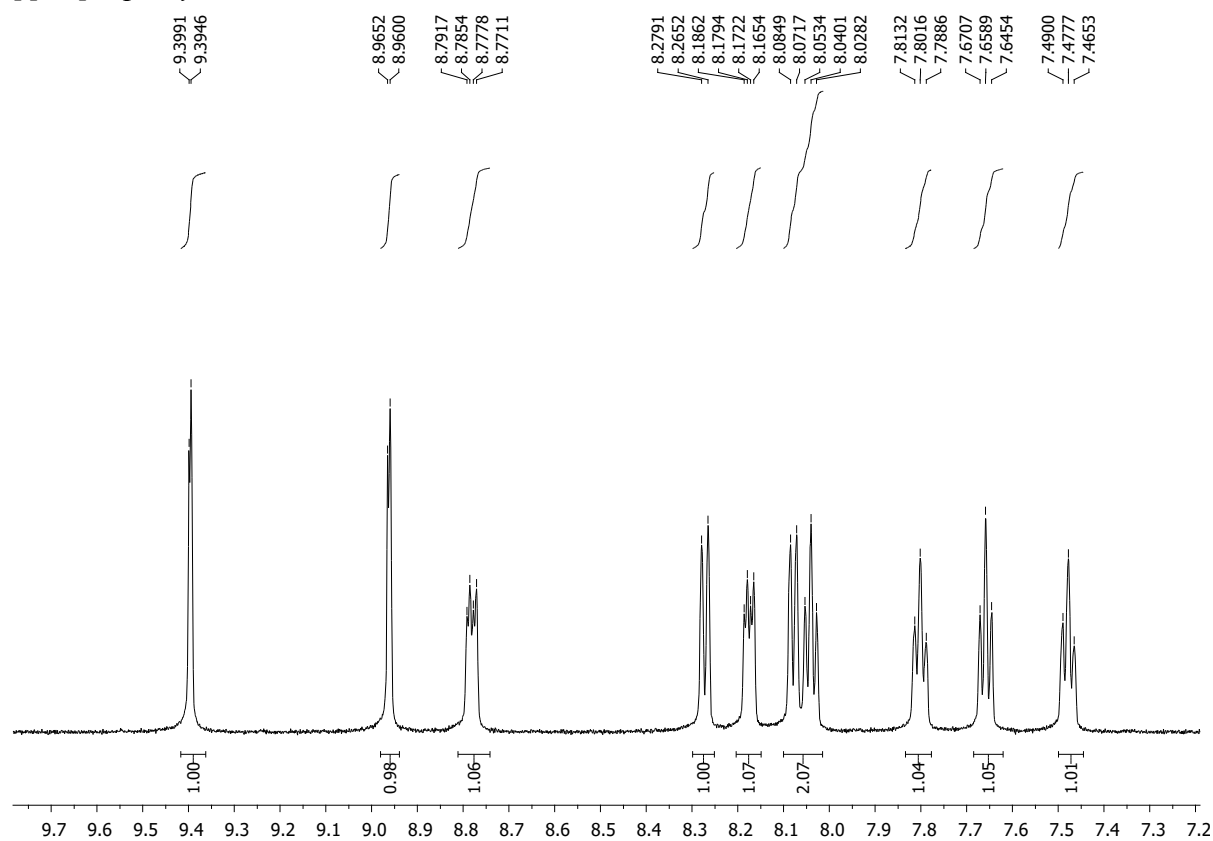

**Figure S47.**  $^1\text{H}$  NMR spectrum (DMSO- $d_6$ , 600 MHz) of *benzo[g]benzo[4,5]imidazo[1,2-a][1,5]naphthyridine-7-carbonitrile 18*

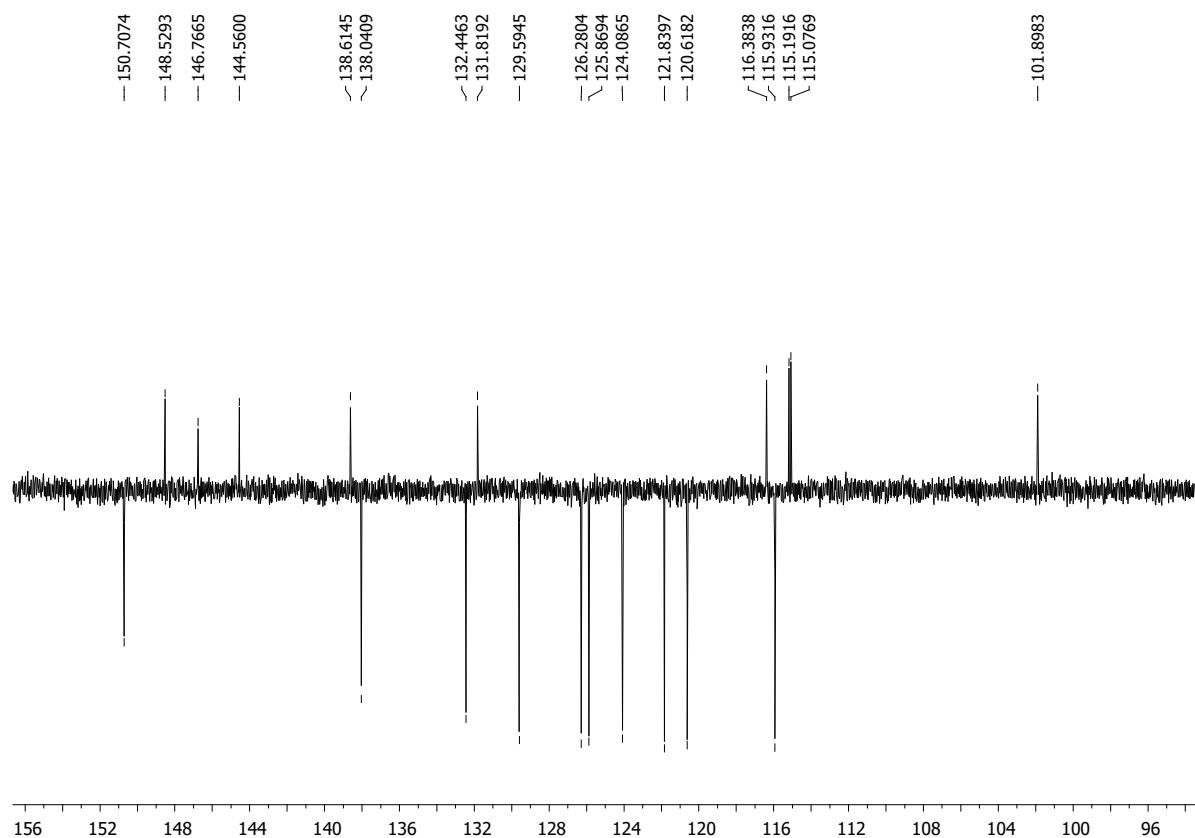

**Figure S48.**  $^{13}\text{C}$  NMR spectrum (DMSO- $d_6$ , 150 MHz) of *benzo[g]benzo[4,5]imidazo[1,2-a][1,5]naphthyridine-7-carbonitrile 18*

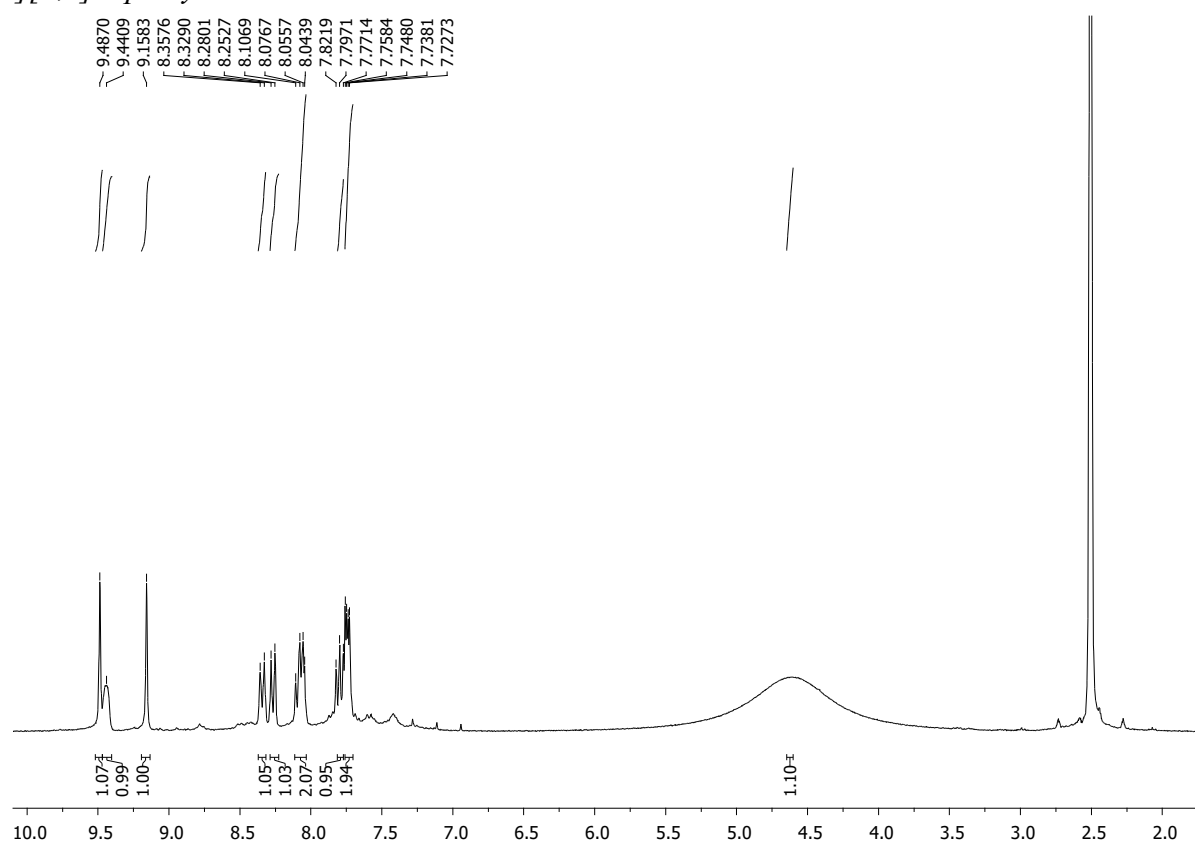

**Figure S49.**  $^1\text{H}$  NMR spectrum (DMSO- $d_6$ , 300 MHz) of *benzo[g]benzo[4,5]imidazo[1,2-a][1,8]naphthyridine-6-carboxylic acid 23*

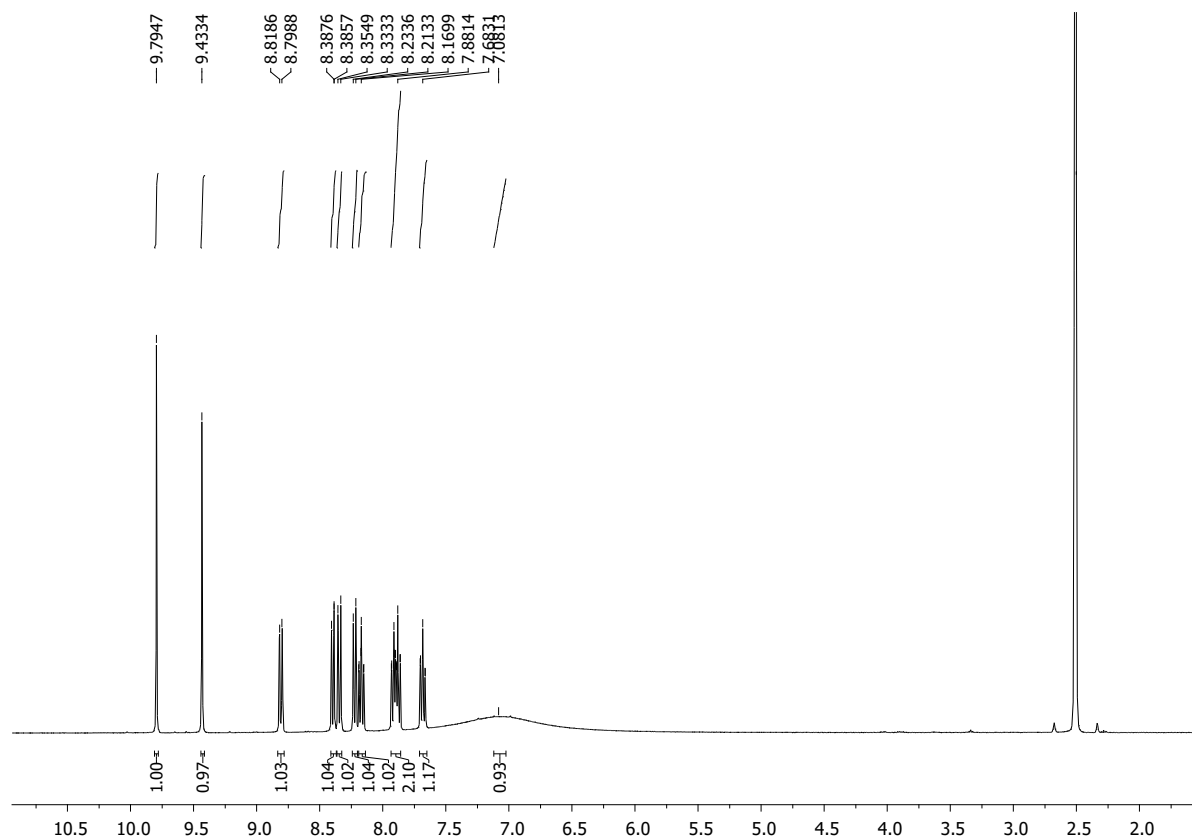

**Figure S50.**  $^1\text{H}$  NMR spectrum (DMSO- $d_6$ , 400 MHz) of *benzo[g]benzo[4,5]imidazo[1,2-a][1,5]naphthyridine-7-carboxylic acid 27*

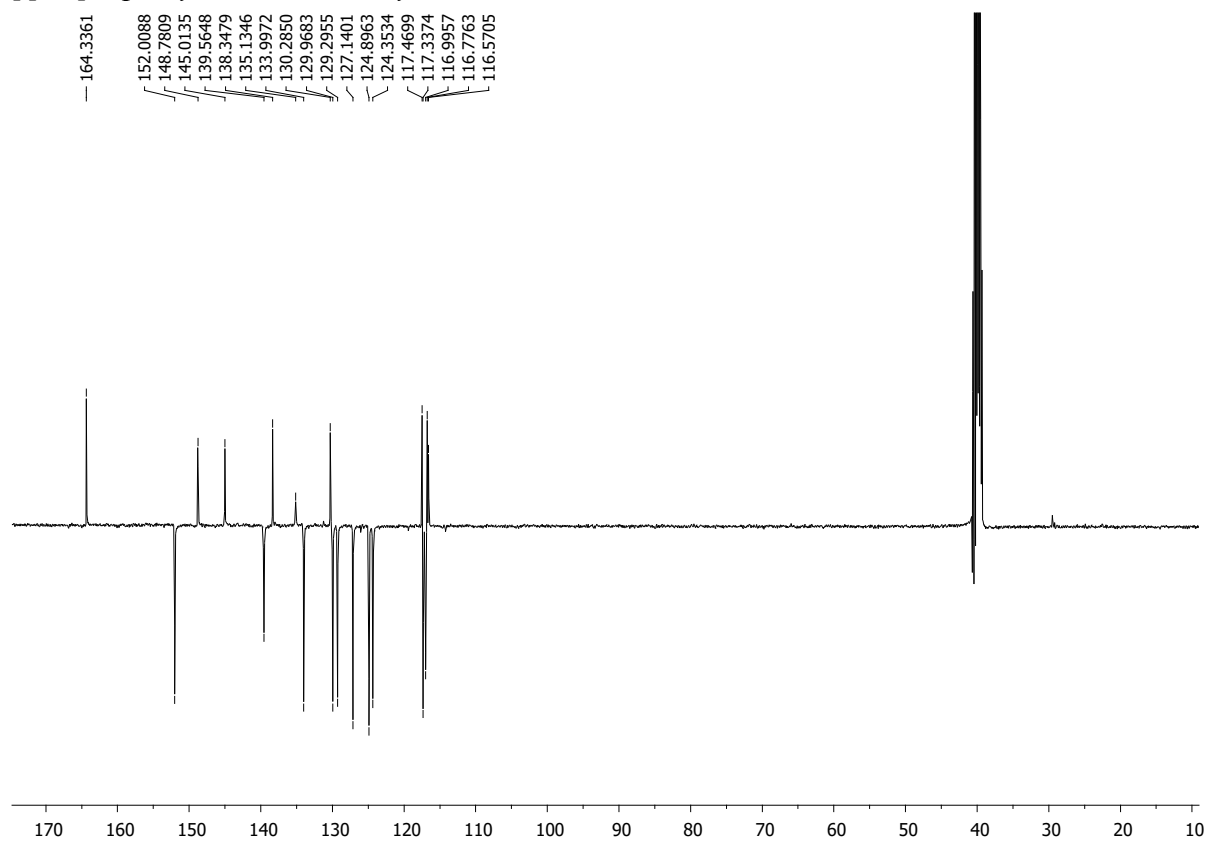

**Figure S51.**  $^{13}\text{C}$  NMR spectrum (DMSO- $d_6$ , 100 MHz) of *benzo[g]benzo[4,5]imidazo[1,2-a][1,5]naphthyridine-7-carboxylic acid 27*

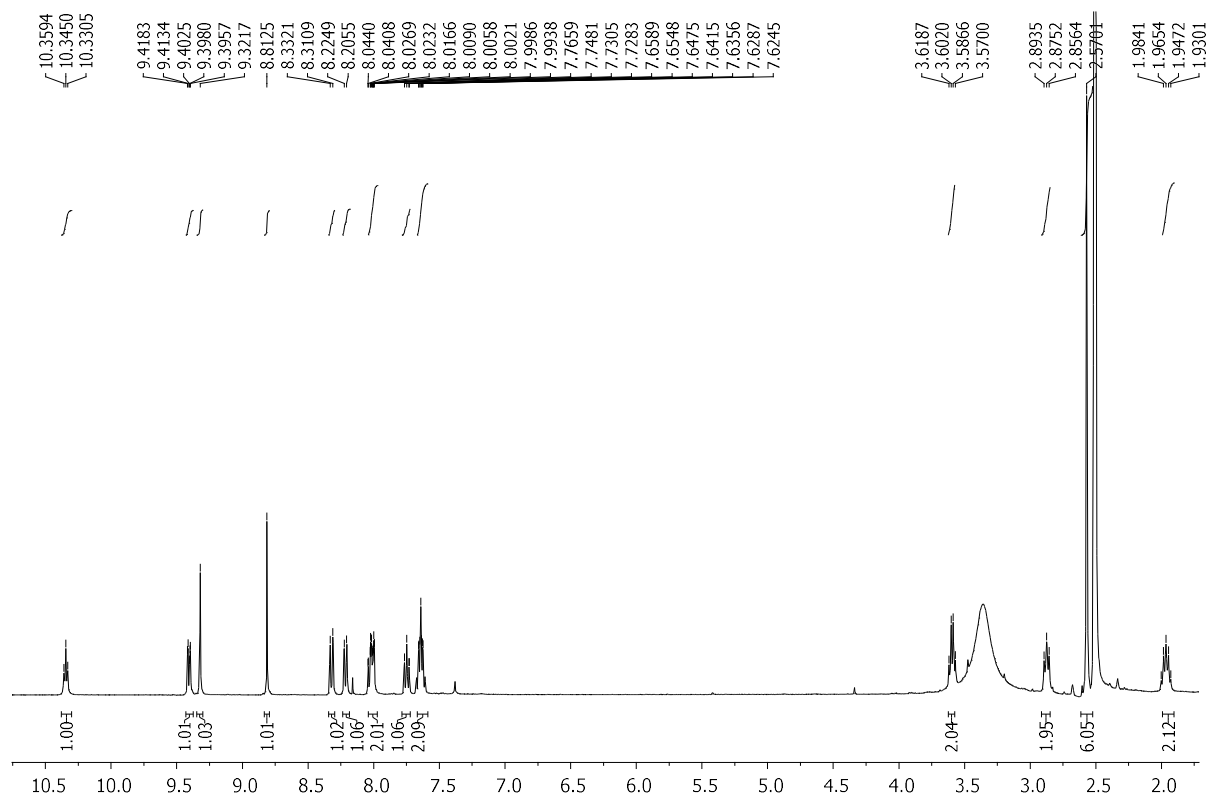

**Figure S52.** <sup>1</sup>H NMR spectrum (DMSO-*d*<sub>6</sub>, 400 MHz) of *N*-(3-*N,N*-(dimethylamino)propyl)benzo[*g*]benzo[4,5]imidazo[1,2-*a*][1,8]naphthyridine-6-carboxamide **25**

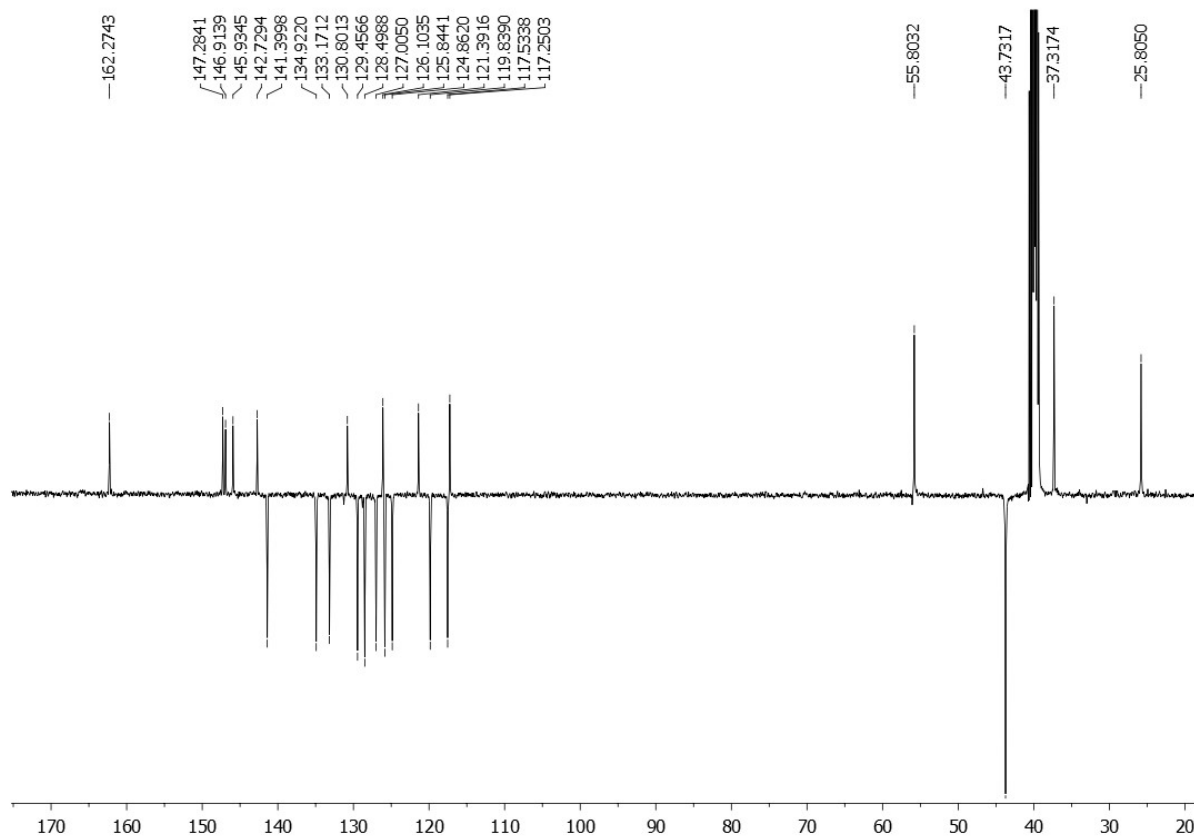

**Figure S53.** <sup>13</sup>C NMR spectrum (DMSO-*d*<sub>6</sub>, 100 MHz) of *N*-(3-*N,N*-(dimethylamino)propyl)benzo[*g*]benzo[4,5]imidazo[1,2-*a*][1,8]naphthyridine-6-carboxamide **25**

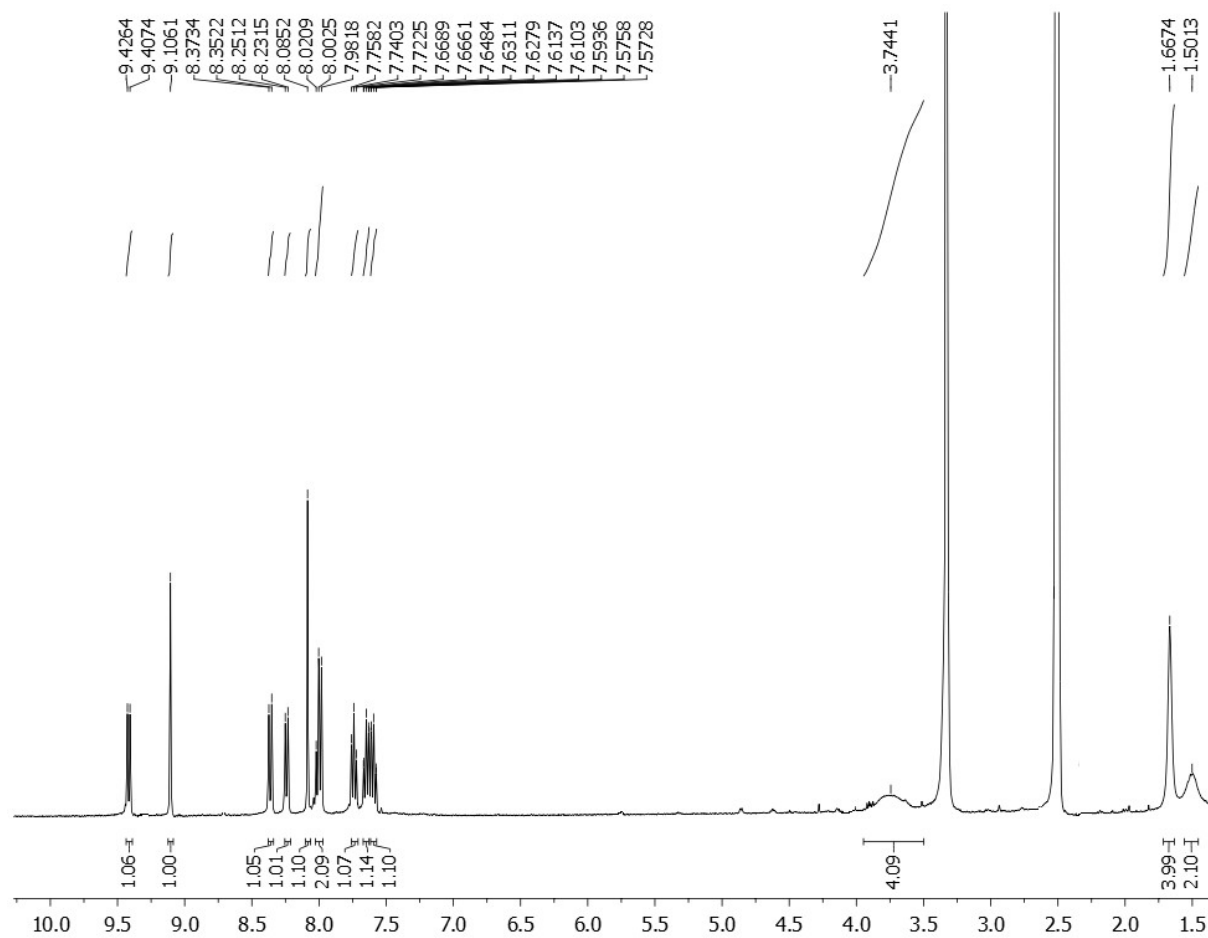

**Figure S54.** <sup>1</sup>H NMR spectrum (DMSO-*d*<sub>6</sub>, 400 MHz) of *benzo[g]benzo[4,5]imidazo[1,2-a][1,8]naphthyridin-6-yl(piperidin-1-yl)methanone* **26**

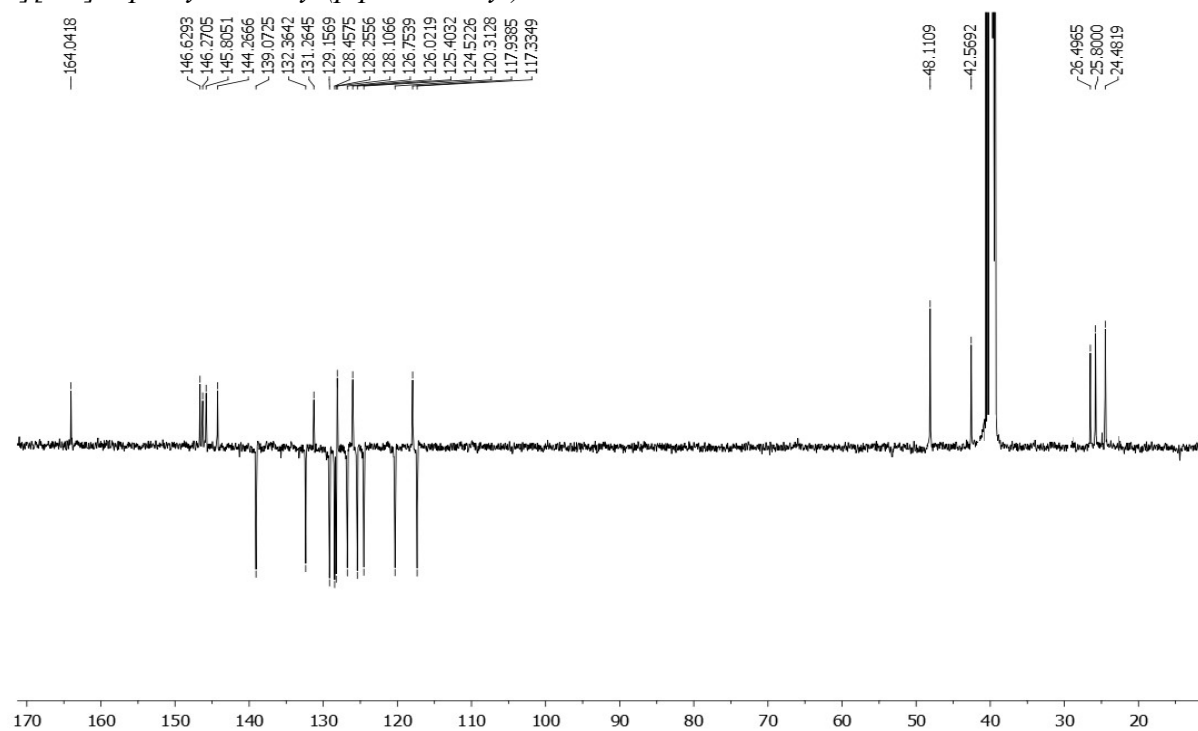

**Figure S55.** <sup>13</sup>C NMR spectrum (DMSO-*d*<sub>6</sub>, 100 MHz) of *benzo[g]benzo[4,5]imidazo[1,2-a][1,8]naphthyridin-6-yl(piperidin-1-yl)methanone* **26**

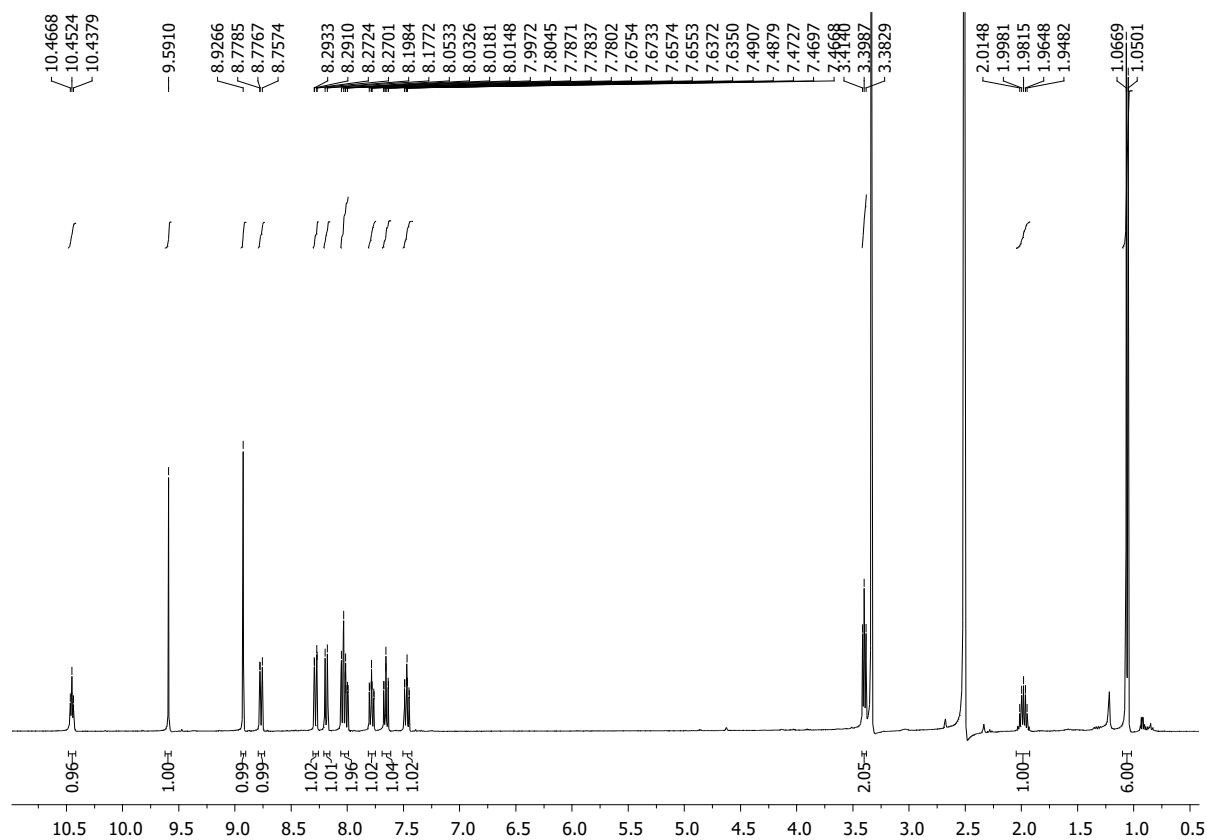

**Figure S56.** <sup>1</sup>H NMR spectrum (DMSO-*d*<sub>6</sub>, 400 MHz) of *N*-isobutylbenzo[*g*]benzo[4,5]imidazo[1,2-*a*][1,5]naphthyridine-7-carboxamide **29**

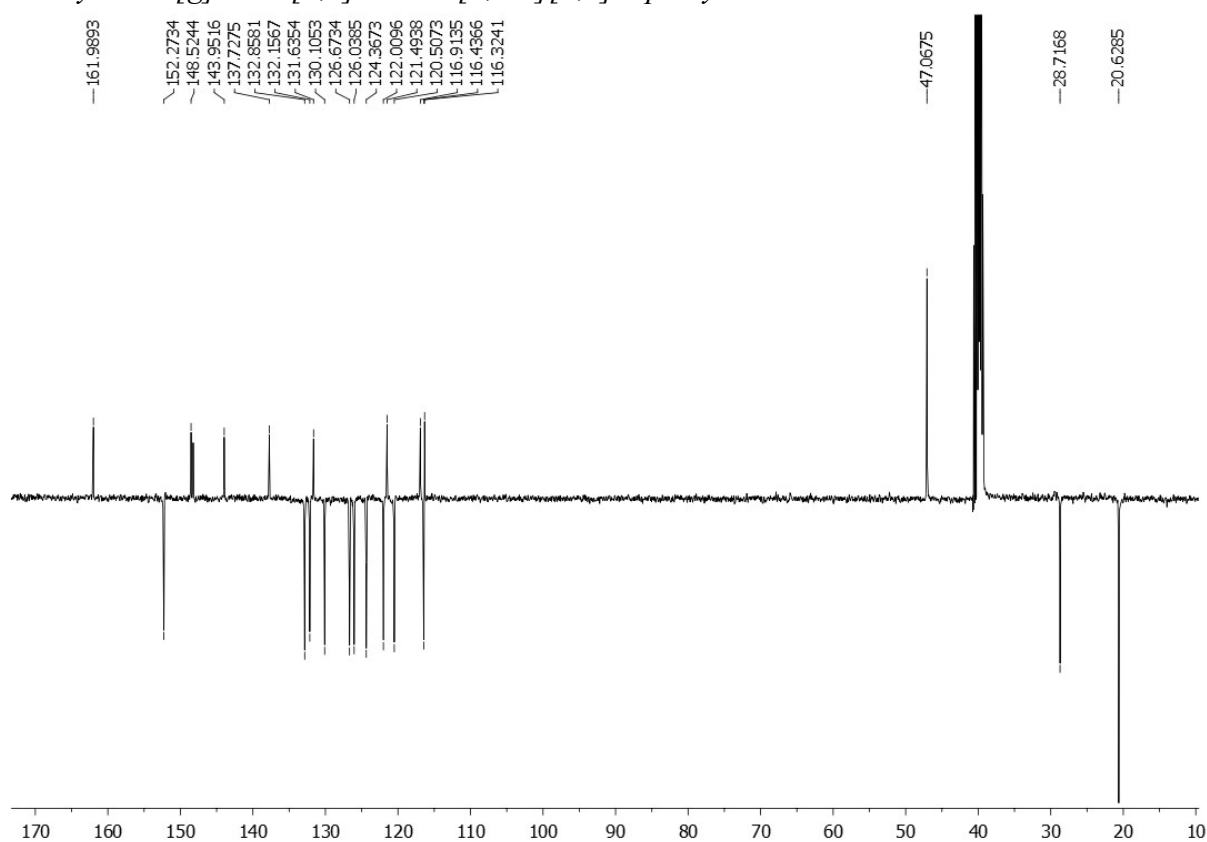

**Figure S57.** <sup>13</sup>C NMR spectrum (DMSO-*d*<sub>6</sub>, 100 MHz) of *N*-isobutylbenzo[*g*]benzo[4,5]imidazo[1,2-*a*][1,5]naphthyridine-7-carboxamide **29**

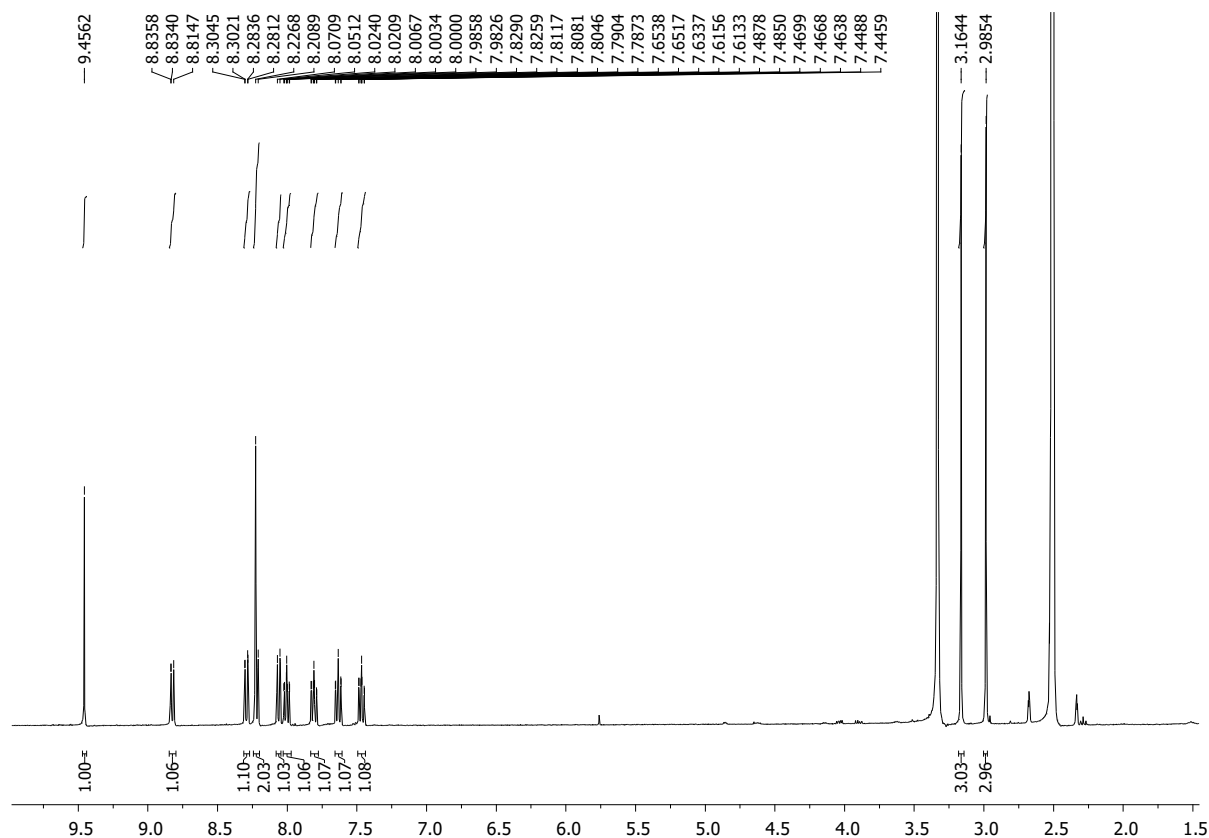

**Figure S58.** <sup>1</sup>H NMR spectrum (DMSO-*d*<sub>6</sub>, 400 MHz) of *N,N*-dimethylbenzo[*g*]benzo[4,5]imidazo[1,2-*a*][1,5]naphthyridine-7-carboxamide **30**

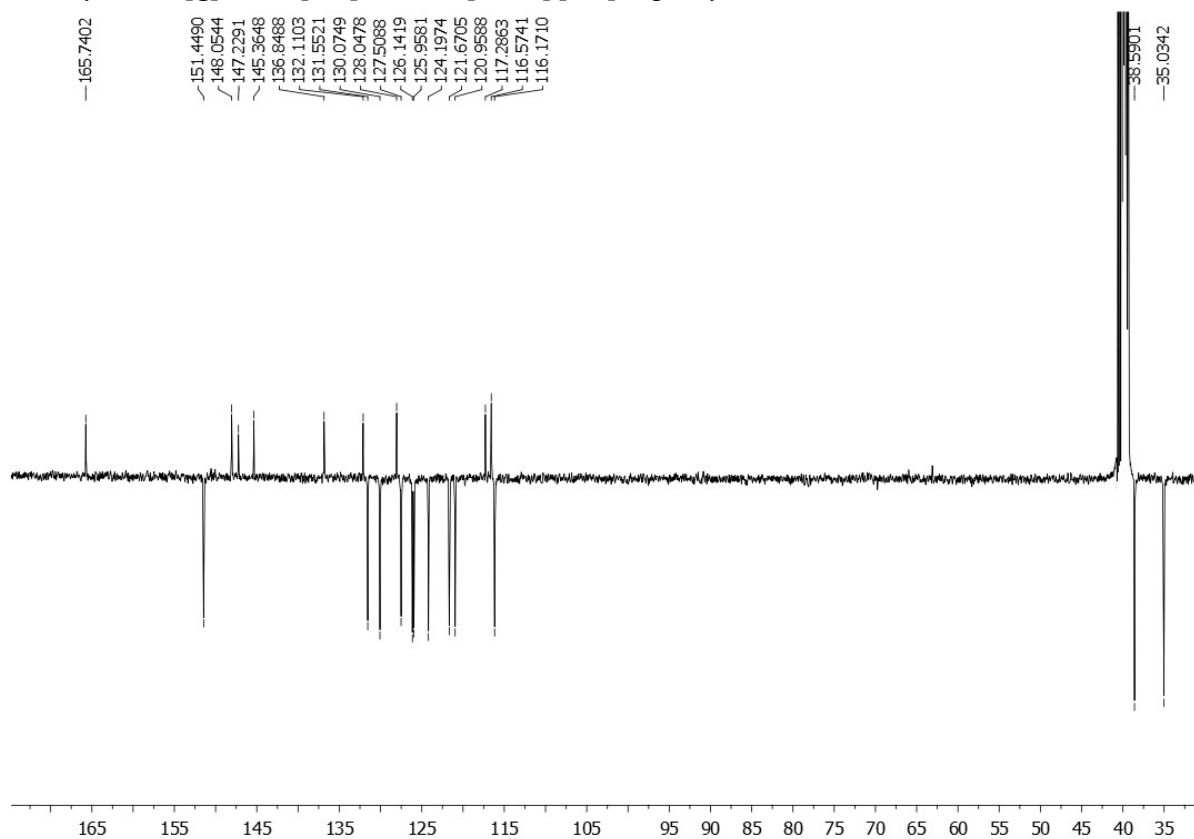

**Figure S59.** <sup>13</sup>C NMR spectrum (DMSO-*d*<sub>6</sub>, 100 MHz) of *N,N*-dimethylbenzo[*g*]benzo[4,5]imidazo[1,2-*a*][1,5]naphthyridine-7-carboxamide **30**
